# Supplementary material for: Effects of Environmental and Socioeconomic Inequalities on Health Outcomes: A Multi-Region Time-Series Study
Source: MDPI journal article supplement (doi:10.3390/ijerph192416521), 2022-12-09
Supplement: s1 [file s1]

# Effects of Environmental and Socioeconomic Inequalities on Health Outcomes: A Multi-Region Time-Series Study

Iara da Silva <sup>1,2,\*</sup>, Caroline Fernanda Hei Wikuats <sup>1,2</sup>, Elizabeth Mie Hashimoto <sup>1</sup>  
and Leila Droprinchinski Martins <sup>1</sup>

1 Graduate Program in Environmental Engineering, Campus Londrina, Federal University of Technology—Paraná, Av. Dos Pioneiros, 3131, Londrina 86036-370, Paraná, Brazil

2 Department of Atmospheric Sciences, Institute of Astronomy, Geophysics and Atmospheric Sciences, University of São Paulo, Rua do Matão, 1226, São Paulo 05508-090, São Paulo, Brazil

\* Correspondence: [iara@alunos.utfpr.edu.br](mailto:iara@alunos.utfpr.edu.br)

Supplementary material

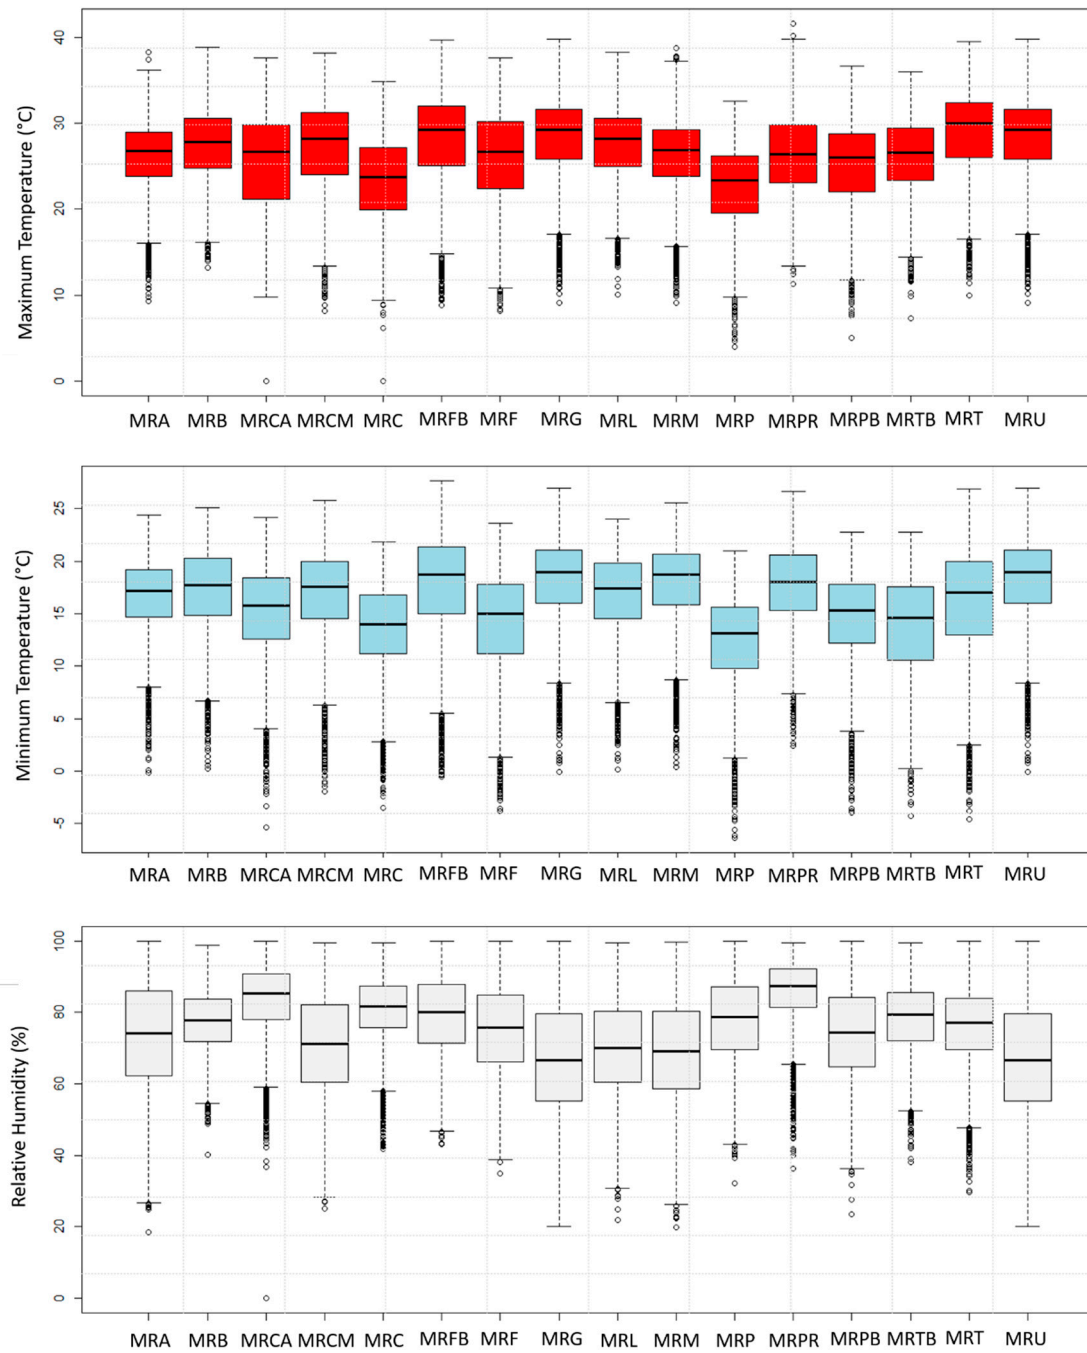

**Figure S1.** Boxplot of meteorological variables for regions in the period analyzed.

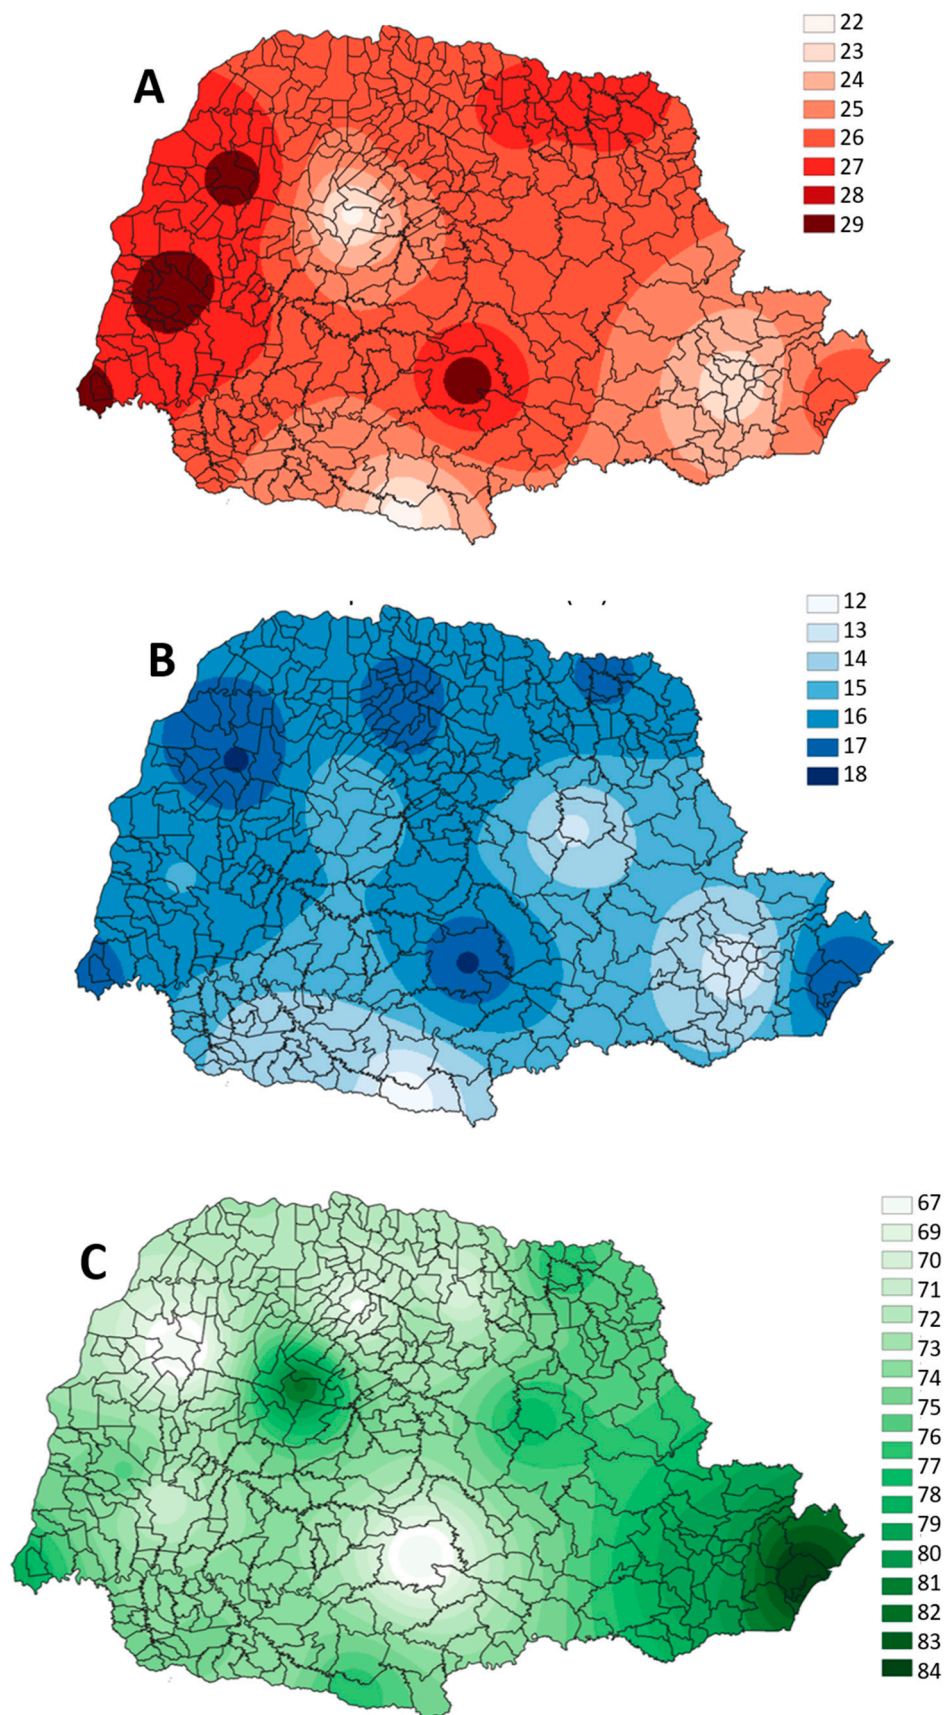

**Figure S2.** Average of (A) maximum and (B) minimum temperatures (°C). And (C) relative humidity (%) for the study period.

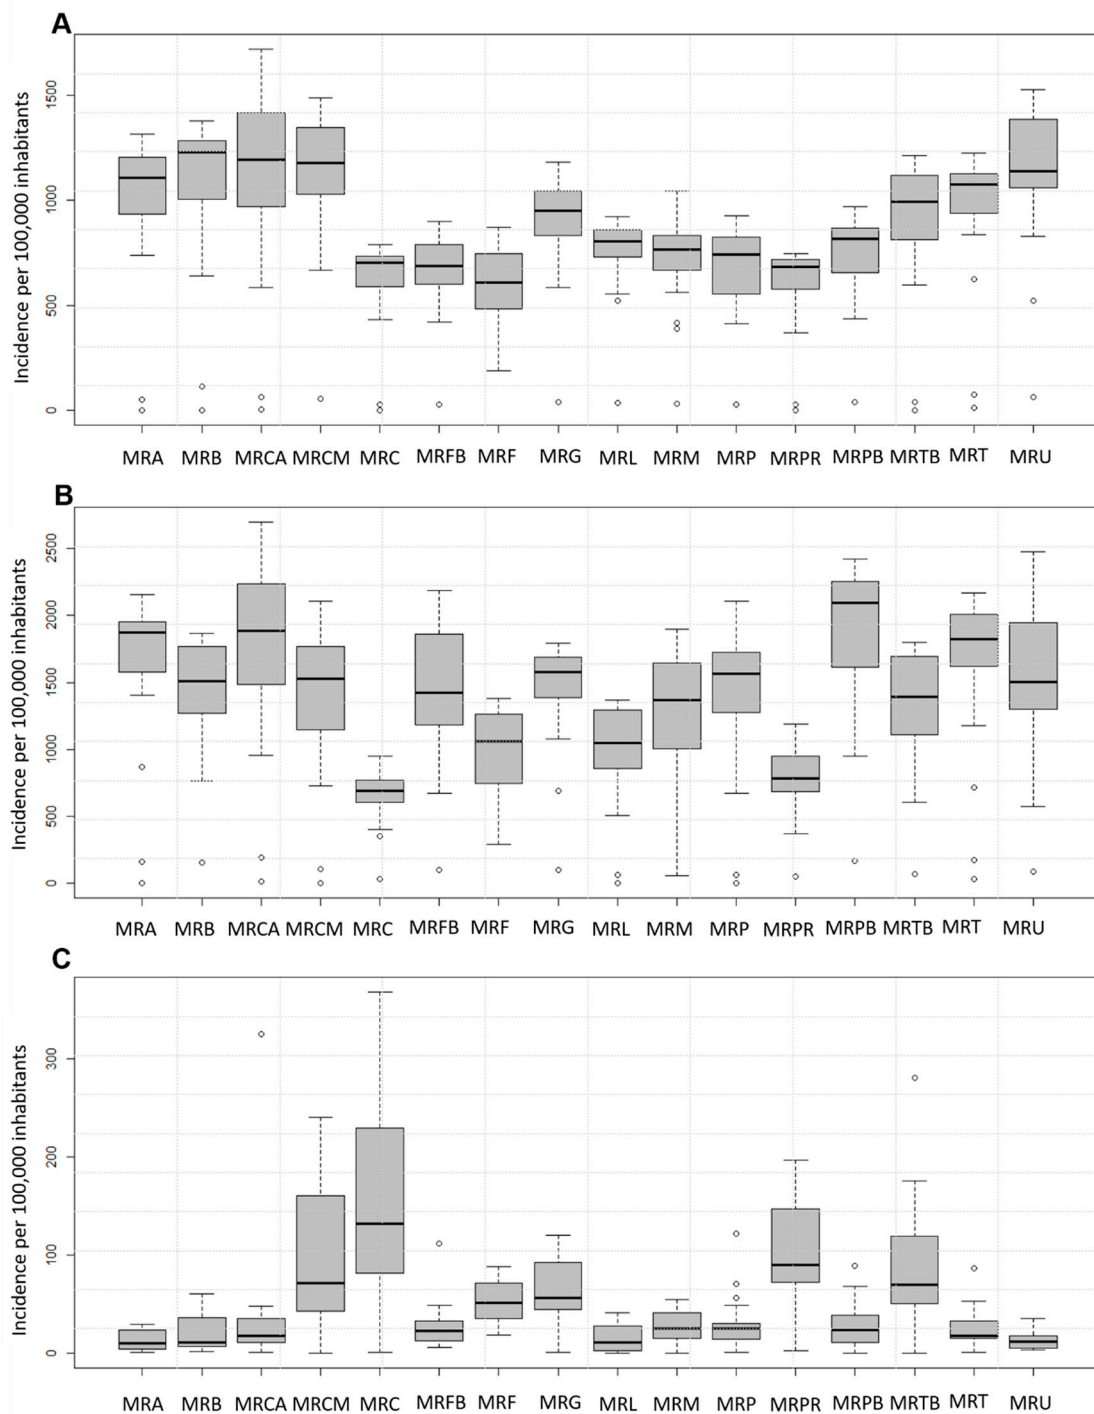

**Figure S3.** Boxplot of hospital admissions by diseases for regions in the period analyzed: (A) Cardiovascular, (B) Respiratory, and (C) Mental disorders.

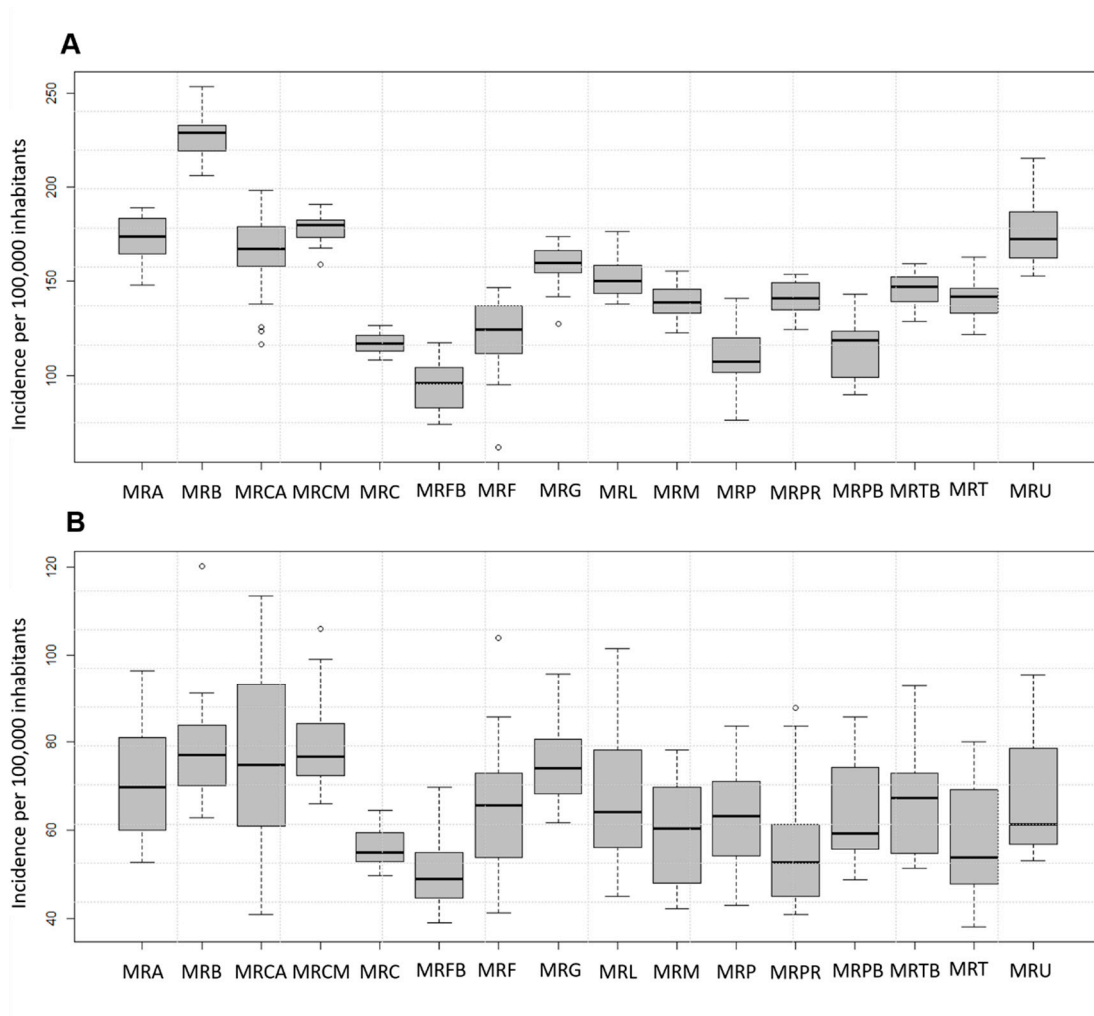

**Figure S4.** Boxplot of deaths by diseases for regions in the period analyzed: (A) Cardiovascular, (B) Respiratory.

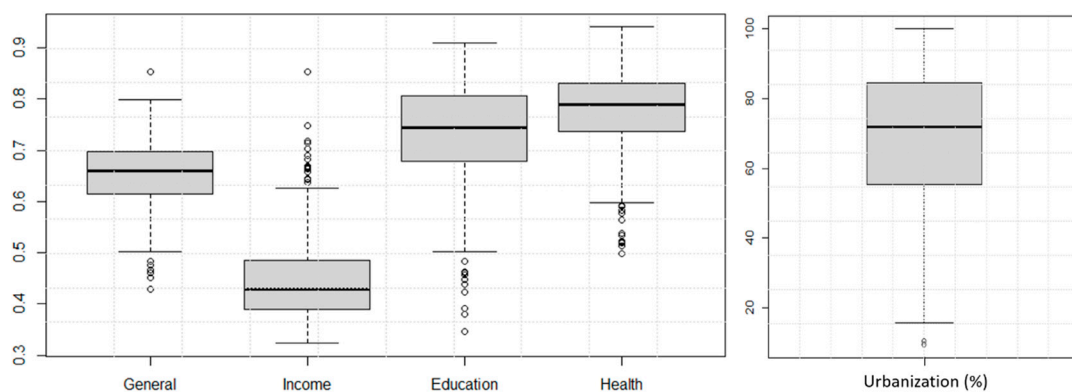

**Figure S5.** Average value (2010–2019) of the IPDM (Ipardes Municipal Development Index) – index that measures the performance of 399 municipalities in the state of Paraná, considering some dimensions: income, employment, production, health and education, and municipal urbanization rate.



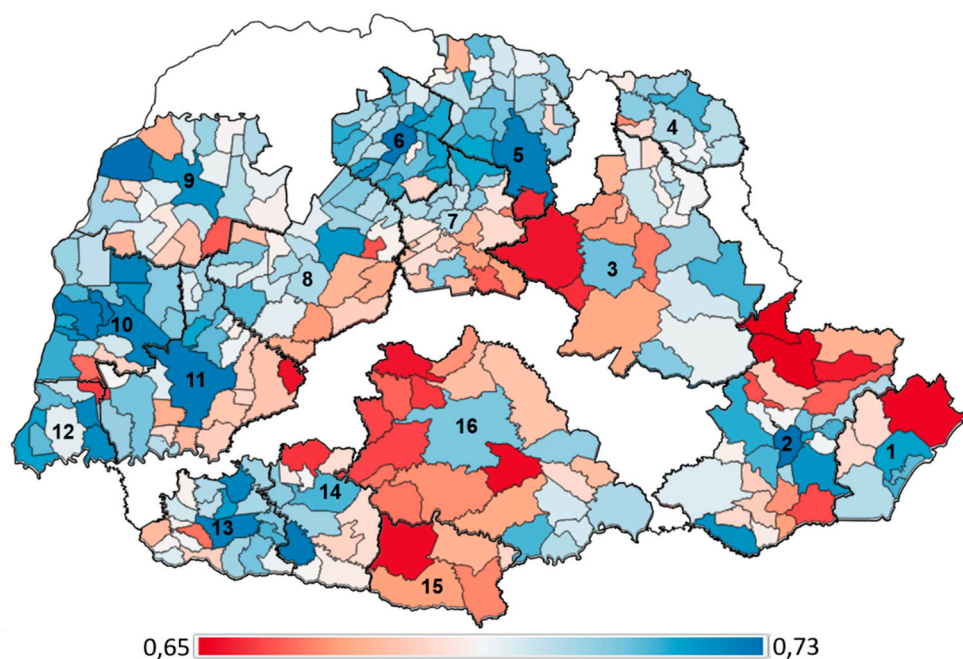

**Figure S6.** Municipal Human Development Index (MHDI) for the municipalities studied (2010 census) that composed the MR. MR's: Paranaguá (1), Curitiba (2), Telêmaco Borba (3), Bandeirantes (4), Londrina (5), Maringá (6), Apucarana (7), Campo Mourão (8), Umuarama (9), Toledo (10), Cascavel (11), Foz do Iguaçu (12), Francisco Beltrão (13), Pato Branco (14), Palmas (15), e Guarapuava (16). Bold contours indicate the municipalities in each MR.

The MHDI is a synthetic index that seeks to capture the socioeconomic conditions of the municipalities in the state of Paraná in its most significant dimensions: income (composed of income, employment, and agricultural production), education and health. It follows a similar line to the Human Development Index (HDI), prepared by the United Nations Development Programme (UNDP). The MHDI aims to provide the various spheres of government and civil society in general with an updated reading every year of relevant aspects of local development in the state. The index is built using different data sources of an administrative nature made available by public entities. The partial income index is constructed from data referring to work remuneration, formal employment, and agricultural production. In turn, the education index derives from information on early childhood education and basic education indicators, such as teachers with higher education, dropout rate, age-grade distortion rate, and Basic Education Development Index (IDEB). The health index comprises the percentage of prenatal consultations (more than six per child born alive), the share of deaths listed as ill-defined causes, and the ratio of deaths of children under five years of age from preventable causes among live births. Finally, the general MHDI index is calculated through the simple arithmetic mean of the partial indices mentioned above. Both the general and the partial indexes have values between 0 and 1, representing the minimum and maximum position of performance.

Next, the methodology for building the index is presented, separated by the three areas of development, namely: employment, income, and agricultural production; education; and health – each responsible for 33.33% (one-third) of the final index. The source is reference number 46, mentioned in the main manuscript.

## 1. Employment, Income, and Agricultural Production

### 1.1. Income

To obtain this component, the IPARDES Institute that calculates the index use information from annual data of the Work Ministry (in Portuguese *Relação Anual de Informação Social do Ministério do Trabalho e Emprego (RAIS-TEM)*). The growing rate of income and the absolute average income compose the variable income.

This indicator retains the greatest weight in the composition of the final index of employment, income, and agricultural production, corresponding to 42% of the total.

### 1.2. Employment

Employment comprises the formalization index, employment growth rate, and share of employment in the municipality in total employment in the state of Paraná. A score of 1 is assigned to municipalities with values greater than the 99<sup>th</sup> percentile, and a 0 score is assigned to those below the 1st percentile. This is done for the three factors.

### 1.3. Agricultural Production

To calculate the agricultural production sub-indicator, the gross value of municipal agricultural production and the gross value of production of animal origin were used, with data available at IBGE (<https://www.ibge.gov.br/>).

For the livestock sector, as the Gross Value of Production (GPV) is not available, the number of total carcasses of cattle, pigs, and poultry per municipality was estimated, and this amount was multiplied by the average price provided by IPEA (<https://www.ipea.gov.br/porta/>). Thus, considering the VBP, 1 is assigned to the municipality with the highest value.

## 2. Education

The Education dimension comprises indicators for kindergarten (20%), fundamental (69%) and secondary education (11%). The data source is the Ministry of Education, with indicators available at: <http://portal.inep.gov.br/indicadores-educacionais> and <http://portalideb.inep.gov.br>.

## 3. Health

The databases of the Secretariat of Health (SESA – Paraná) and the Population Projection calculated by IPARDES are used for health. The variables that compose the Health dimension are presented below.

### 3.1. Percentage of More Than Six Prenatal Consultations Per Child Born Alive

For the calculation of the maximum value, the percentage of 95% and the minimum of 0% were established. For the other municipalities, the values were scaled according to the percentage they have of the maximum score.

### 3.2. Percentage of Deaths From Ill-Defined Causes

The average percentage value equivalent to the 99<sup>th</sup> percentile in the 2008-2009-2010 triennium is used for the minimum level cut. For municipalities with a percentage greater than or equal to the minimum, a value of 1 was assigned, reflecting the worst situation. For the other municipalities, the values were obtained by the quotient between the percentage and the value of the 99<sup>th</sup> percentile. As the objective is to evaluate the best situation of the municipalities in this indicator, it was necessary to calculate its complement (100 minus the percentage of deaths due to ill-defined causes).

### 3.3. Percentage of Deaths of Children Under Five Years Old Due to Avoidable Causes by Live Birth

This indicator translates the ratio between the number of deaths of children under five from preventable causes per 100 live births in the same period. It follows the same criteria as indicated above in 3.2.



**Table S1.** Relative risk values with 95% confidence interval of hospitalization for cardiovascular diseases associated with explanatory variables for the groups and regions studied. The most significant lag are presented in parentheses.

| Groups | MRA                                                                                                     | MRB                                                                 | MRCA                                                                                                    | MRCM                              |
|--------|---------------------------------------------------------------------------------------------------------|---------------------------------------------------------------------|---------------------------------------------------------------------------------------------------------|-----------------------------------|
| GM1    | -                                                                                                       | -                                                                   | -                                                                                                       | TMAX - 1.0049 (1.0029-1.0069) (0) |
|        |                                                                                                         |                                                                     |                                                                                                         | TMAX - 1.0029 (1.0009-1.0049) (4) |
|        |                                                                                                         |                                                                     |                                                                                                         | TMAX - 1.0052 (1.0036-1.0068) (6) |
|        |                                                                                                         |                                                                     |                                                                                                         | MHDI - 0.8957 (0.8237-0.9740)     |
| GM2    | TMAX - 1.0167 (1.0083-1.0252) (0)<br>RH - 1.0022 (1.0008-1.0036) (0)<br>MHDI - 1.0002 (1.0001-1.0002)   | TMIN - 1.0071 (1.0013-1.0130) (1)<br>MHDI - 1.0121 (0.9616-1.06528) | TMAX - 1.0057 (1.0001-1.0113) (0)<br>MHDI - 1.2087 (1.1444-1.2766)                                      | TMAX - 1.0037 (1.0021-1.0053) (0) |
|        |                                                                                                         |                                                                     |                                                                                                         | TMAX - 1.0022 (1.0005-1.0039) (3) |
|        |                                                                                                         |                                                                     |                                                                                                         | TMAX - 1.0033 (1.0014-1.0051) (4) |
|        |                                                                                                         |                                                                     |                                                                                                         | MHDI - 0.8787 (0.8181-0.9437)     |
| GM3    | TMAX - 1.0100 (1.0013-1.0188) (0)<br>TMAX - 1.0129 (1.0042-1.0218) (7)<br>MHDI - 1.1548 (1.0337-1.2901) | -                                                                   | TMAX - 1.0059 (1.0002-1.0116) (0)<br>MHDI - 1.3788 (1.2322-1.5427)                                      | TMAX - 1.0041 (1.0009-1.0072) (4) |
|        |                                                                                                         |                                                                     |                                                                                                         | TMAX - 1.0086 (1.0061-1.0111) (6) |
|        |                                                                                                         |                                                                     |                                                                                                         | MHDI - 1.1102 (0.9734-1.2662)     |
|        |                                                                                                         |                                                                     |                                                                                                         | TMAX - 1.0043 (1.0025-1.0062) (0) |
| GW1    | TMIN - 1.0276 (1.0028-1.0530) (0)<br>MHDI - 1.0000 (1.0000-1.0000)                                      | -                                                                   | TMAX - 1.0104 (1.0059-1.0138) (0)<br>TMAX - 1.0048 (1.0014-1.0081) (3)<br>MHDI - 1.0419 (0.9965-1.0894) | TMAX - 1.0068 (1.0048-1.0087) (4) |
|        |                                                                                                         |                                                                     |                                                                                                         | TMAX - 1.0054 (1.0037-1.0071) (6) |
|        |                                                                                                         |                                                                     |                                                                                                         | MHDI - 0.7948 (0.7455-0.8474)     |
|        |                                                                                                         |                                                                     |                                                                                                         | TMAX - 1.0050 (1.0034-1.0067) (0) |
| GW2    | TMAX - 1.012 (1.0042-1.0195) (0)<br>MHDI - 1.3611 (1.2733-1.4549)                                       | -                                                                   | TMAX - 1.0083 (1.0054-1.0112) (0)<br>TMAX - 1.0037 (1.0002-1.0072) (3)<br>MHDI - 0.9173 (0.8677-0.9698) | TMAX - 1.0018 (1.0001-1.0034) (1) |
|        |                                                                                                         |                                                                     |                                                                                                         | MHDI - 0.8053 (0.7611-0.8520)     |
|        |                                                                                                         |                                                                     |                                                                                                         | TMAX - 1.0128 (1.0104-1.0153) (0) |
|        |                                                                                                         |                                                                     |                                                                                                         | TMAX - 1.0058 (1.0029-1.0087) (4) |
| GW3    | -                                                                                                       | RH - 1.0040 (1.0004-1.0047) (2)<br>MHDI - 1.1999 (0.9580-1.5028)    | -                                                                                                       | TMAX - 1.0086 (1.0062-1.0109) (6) |
|        |                                                                                                         |                                                                     |                                                                                                         | MHDI - 1.1405 (1.0247-1.2695)     |
| Groups | MRC                                                                                                     | MRFB                                                                | MRF                                                                                                     | MRG                               |
| GM1    | RH - 1.0013 (1.0003-1.0023) (2)<br>RH - 1.0027 (1.0017-1.0037) (6)<br>MHDI - 0.8663 (0.8134-0.9226)     | RH - 1.0036 (1.0017-1.0055) (2)<br>MHDI - 0.7891 (0.7160-0.8696)    | -                                                                                                       | TMAX - 1.0035 (1.0000-1.0071) (0) |
|        |                                                                                                         |                                                                     |                                                                                                         | MHDI - 1.0039 (0.9632-1.0464)     |
|        |                                                                                                         |                                                                     |                                                                                                         |                                   |
| GM2    | RH - 1.0020 (1.0011-1.0030) (6)                                                                         | -                                                                   | -                                                                                                       | COM - 1.0054 (1.0030-1.0077) (0)  |

|        | MHDI – 0.9179 (0.8847-0.9524)     |                                   |                                   |                                   |
|--------|-----------------------------------|-----------------------------------|-----------------------------------|-----------------------------------|
| GM3    | RH - 1.0025 (1.0011-1.0040) (2)   | TMAX - 1.0193 (1.0078-1.0308) (0) | TMAX - 1.0192 (1.0058-1.0329) (0) | -                                 |
|        | MHDI – 0.8505 (0.8038-0.8998)     | MHDI – 1.2722 (1.0492-1.5426)     | MHDI – 1.2749 (1.0298-1.5785)     |                                   |
| GW1    | -                                 | -                                 | -                                 | -                                 |
| GW2    | -                                 | RH - 1.0022 (1.0009-1.0036) (2)   | -                                 | TMIN - 1.0115 (1.0050-1.0180) (0) |
|        |                                   | MHDI – 1.0747 (1.0056-1.1486)     |                                   | MHDI – 1.2367 (1.1806-1.2954)     |
| GW3    | RH - 1.0025 (1.0011-1.0040) (2)   | TMAX - 1.0193 (1.0078-1.0308) (0) | RH - 1.0095 (1.0052-1.0139) (3)   | TMAX - 1.0114 (1.0061-1.0167) (0) |
|        | MHDI – 0.7285 (0.6653-0.7977)     | MHDI – 0.8522 (0.7582-0.9579)     | MHDI – 1.0623 (0.8733-1.2921)     | TMAX - 1.0092 (1.0032-1.0152) (7) |
|        |                                   |                                   |                                   | MHDI – 1.2023 (1.0961-1.3187)     |
| Groups | MRL                               | MRM                               | MRP                               | MRPR                              |
| GM1    | -                                 | TMAX - 1.0078 (1.0043-1.0113) (0) | -                                 | -                                 |
|        |                                   | MHDI – 0.9124 (0.8119-1.0253)     |                                   |                                   |
| GM2    | -                                 | TMAX - 1.0062 (1.0002-1.0122) (0) | -                                 | TMAX - 1.0026 (1.0001-1.0088) (3) |
|        |                                   | MHDI – 0.9508 (0.9029-1.0013)     |                                   | MHDI – 1.5165 (1.2943-1.7769)     |
| GM3    | -                                 | TMAX - 1.0011 (1.0010-1.015) (0)  | -                                 | -                                 |
|        |                                   | TMAX - 1.0005 (1.0001-1.0042) (3) |                                   |                                   |
|        |                                   | MHDI – 1.1716 (1.0549-1.3011)     |                                   |                                   |
| GW1    | TMAX - 1.0410 (1.0032-1.0803) (1) | TMAX - 1.0040 (1.0005-1.0076) (4) | RH - 1.0048 (1.0014-1.0081) (1)   | -                                 |
|        | MHDI – 1.0000 (1.0000-1.0000)     | TMAX - 1.0035 (1.0000-1.0069) (7) | MHDI – 1.6713 (1.4188-1.9689)     |                                   |
|        |                                   | MHDI – 1.5899 (1.5186-1.6646)     |                                   |                                   |
| GW2    | -                                 | TMAX - 1.0076 (1.0025-1.0039) (0) | -                                 | TMIN - 1.0009 (1.0007-1.0017) (5) |
|        |                                   | TMAX - 1.0041 (1.0008-1.0074) (7) |                                   | MHDI – 1.0931 (0.9828-1.2157)     |
|        |                                   | MHDI – 0.8738 (0.8304-0.9194)     |                                   |                                   |
| GW3    | -                                 | TMAX - 1.0158 (1.0086-1.0230) (0) | -                                 | -                                 |
|        |                                   | RH - 1.0032 (1.0017-1.0012) (2)   |                                   |                                   |
|        |                                   | MHDI – 0.8341 (0.7505-0.9271)     |                                   |                                   |
| Groups | MRPB                              | MRTB                              | MRT                               | MRU                               |
| GM1    | -                                 | RH - 1.0017 (1.0000-1.0033) (2)   | TMAX - 1.0051 (1.0008-1.0094) (0) | TMAX - 1.0048 (1.0002-1.0094) (0) |
|        |                                   | MHDI – 1.1863 (1.0899-1.2912)     | TMAX - 1.0057 (1.0006-1.0107) (7) | TMAX - 1.0062 (1.0009-1.0116) (3) |
|        |                                   |                                   | MHDI – 0.8072 (0.7442-0.8755)     | MHDI – 1.1100 (0.9722-1.2673)     |

|     |                                                                                                                                              |                                                                                                                                            |                                                                  |                                                                                                     |
|-----|----------------------------------------------------------------------------------------------------------------------------------------------|--------------------------------------------------------------------------------------------------------------------------------------------|------------------------------------------------------------------|-----------------------------------------------------------------------------------------------------|
| GM2 | -                                                                                                                                            | RH - 1.0017 (1.0000-1.0032) (2)<br>MHDI – 1.0080 (0.9514-1.0679)                                                                           | TMAX - 1.0094 (1.0037-1.0152) (0)                                | -                                                                                                   |
|     |                                                                                                                                              |                                                                                                                                            | TMIN - 1.0087 (1.0033-1.0139) (5)                                |                                                                                                     |
|     |                                                                                                                                              |                                                                                                                                            | RH - 1.0035 (1.0017-1.0054) (5)<br>MHDI – 0.8109 (0.7478-0.8794) |                                                                                                     |
| GM3 | -                                                                                                                                            | -                                                                                                                                          | TMAX - 1.0113 (1.0050-1.0177) (0)                                | -                                                                                                   |
|     |                                                                                                                                              |                                                                                                                                            | TMAX - 1.0084 (1.0008-1.0161) (4)                                |                                                                                                     |
|     |                                                                                                                                              |                                                                                                                                            | MHDI – 2.0528 (1.8109-2.3268)                                    |                                                                                                     |
| GW1 | TMIN - 1.0098 (1.0011-1.0185) (1)<br>TMIN - 1.0100 (1.0013-1.0188) (4)<br>TMAX - 1.0109 (1.0028-1.0192) (7)<br>MHDI – 0.7063 (0.6301-0.7918) | TMIN - 1.0048 (1.0001-1.0096) (0)<br>TMAX - 1.0066 (1.0026-1.0106) (1)<br>RH - 1.0016 (1.0000-1.0030) (5)<br>MHDI – 1.0044 (0.9562-1.0550) | TMAX - 1.0104 (1.0064-1.0144) (0)                                | -                                                                                                   |
|     |                                                                                                                                              |                                                                                                                                            | TMAX - 1.0054 (1.0007-1.0101) (4)                                |                                                                                                     |
|     |                                                                                                                                              |                                                                                                                                            | MHDI – 1.1282 (1.0460-1.2169)                                    |                                                                                                     |
|     |                                                                                                                                              |                                                                                                                                            |                                                                  |                                                                                                     |
| GW2 | RH - 1.0004 (1.0001-1.0018) (5)<br>RH - 1.0020 (1.0002-1.0038) (6)<br>MHDI – 0.6959 (0.6335-0.7645)                                          | RH - 1.0015 (1.0001-1.0028) (2)<br>MHDI – 1.0883 (1.0020-1.8196)                                                                           | TMAX - 1.0099 (1.0053-1.0147) (0)                                | RH - 1.0013 (1.0002-1.0021) (2)<br>RH - 1.0011 (1.0002-1.0021) (6)<br>MHDI – 1.2333 (1.1181-1.3604) |
|     |                                                                                                                                              |                                                                                                                                            | TMAX - 1.0044 (1.0006-1.0081) (4)                                |                                                                                                     |
|     |                                                                                                                                              |                                                                                                                                            | RH - 1.0015 (1.0001-1.0029) (5)                                  |                                                                                                     |
|     |                                                                                                                                              |                                                                                                                                            | MHDI – 1.2604 (1.1875-1.3377)                                    |                                                                                                     |
| GW3 | TMAX - 1.0202 (1.0113-1.0291) (0)<br>TMAX - 1.0114 (1.0002-1.0228) (4)<br>MHDI – 1.4175 (1.1942-1.6828)                                      | TMAX - 1.0151 (1.0095-1.0208) (0)<br>MHDI – 1.1319 (1.0250-1.2499)                                                                         | TMAX - 1.0064 (1.0024-1.0155) (0)                                | -                                                                                                   |
|     |                                                                                                                                              |                                                                                                                                            | TMIN - 1.0085 (1.0006-1.0164) (0)                                |                                                                                                     |
|     |                                                                                                                                              |                                                                                                                                            | TMIN - 1.0067 (1.0001-1.0108) (3)                                |                                                                                                     |
|     |                                                                                                                                              |                                                                                                                                            | RH - 1.0024 (1.0000-1.0047) (3)<br>MHDI – 1.1089 (1.0194-1.2062) |                                                                                                     |

---

TMAX - Maximum temperature; TMIN - Minimum temperature; RH - Relative humidity; COM - Component.

**Table S2.** Relative risk values with 95% confidence interval of death for cardiovascular diseases associated with explanatory variables for the groups and regions studied. The most significant lag are presented in parentheses.

| Groups | MRA                                                                                                                                      | MRB                                                                                                   | MRCA                                                               | MRCM                                                               |
|--------|------------------------------------------------------------------------------------------------------------------------------------------|-------------------------------------------------------------------------------------------------------|--------------------------------------------------------------------|--------------------------------------------------------------------|
| GM1    | -                                                                                                                                        | -                                                                                                     | -                                                                  | TMIN - 1.0135 (1.0011-1.0261) (4)<br>MHDI – 0.2806 (0.2116-0.3720) |
| GM3    | -                                                                                                                                        | TMAX - 1.0267 (1.0059-1.0478) (0)<br>RH - 1.0120 (1.0042-1.0199) (0)<br>MHDI – 1.0413 (0.8764-1.2373) | -                                                                  | -                                                                  |
| GW1    | TMIN - 1.0276 (1.0028-1.0530) (0)<br>MHDI – 0.8571 (0.7340-1.0009)                                                                       | -                                                                                                     | -                                                                  | -                                                                  |
| GW2    | -                                                                                                                                        | TMIN - 1.0159 (1.0019-1.0302) (3)<br>MHDI – 1.0382 (0.9229-1.1678)                                    | -                                                                  | -                                                                  |
| Groups | MRC                                                                                                                                      | MRFB                                                                                                  | MRF                                                                | MRG                                                                |
| GM1    | -                                                                                                                                        | TMIN - 1.0267 (1.0066-1.0472) (7)<br>MHDI – 1.3516 (1.0067-1.8147)                                    | RH - 1.0089 (1.0029-1.0148) (0)<br>MHDI – 0.3755 (0.1749-0.8061)   | TMIN – 1.0178 (1.0039-1.0318) (4)<br>MHDI – 1.0834 (0.9658-1.2153) |
| GM2    | -                                                                                                                                        | -                                                                                                     | TMAX – 1.0134 (1.0042-1.0226) (1)<br>MHDI – 0.5043 (0.3277-0.7761) | -                                                                  |
| Groups | MRL                                                                                                                                      | MRM                                                                                                   | MRP                                                                | MRPR                                                               |
| GM1    | -                                                                                                                                        | -                                                                                                     | TMAX - 1.0378 (1.0052-1.0714) (5)<br>MHDI – 1.0491 (0.7691-1.4309) | TMIN - 1.0256 (1.0009-1.0510) (3)<br>MHDI – 1.1059 (0.9466-1.2921) |
| GM2    | TMAX - 1.0203 (1.0095-1.0313) (0)<br>RH - 1.0031 (1.0008-1.0054) (0)<br>RH - 1.0022 (1.0009-1.0035) (2)<br>MHDI – 0.9121 (0.8691-0.9573) | -                                                                                                     | RH - 1.0823 (1.0359-1.1308) (2)<br>MHDI – 1.1003 (0.7459-2.6336)   | -                                                                  |
| GM3    | TMAX - 1.0260 (1.0149-1.0372) (0)<br>RH - 1.0031 (1.0007-1.0054) (0)<br>RH - 1.0022 (1.0008-1.0035) (2)<br>MHDI – 0.9771 (0.9083-1.0511) | -                                                                                                     | -                                                                  | -                                                                  |
| GW1    | -                                                                                                                                        | -                                                                                                     | RH - 1.0086 (1.0068-1.0183) (2)<br>MHDI – 0.2496 (0.2465-0.5203)   | TMIN - 1.0359 (1.0069-1.0657) (5)<br>MHDI – 0.9087 (0.7605-1.0858) |
| GW3    | -                                                                                                                                        | -                                                                                                     | -                                                                  | RH - 1.0060 (1.0000-1.0121) (3)                                    |

| MHDI – 1.3051 (1.1398-1.4944) |                                                                                                     |                                                                    |                                                                  |                                                                  |
|-------------------------------|-----------------------------------------------------------------------------------------------------|--------------------------------------------------------------------|------------------------------------------------------------------|------------------------------------------------------------------|
| Groups                        | MRPB                                                                                                | MRTB                                                               | MRT                                                              | MRU                                                              |
| GM1                           | -                                                                                                   | TMAX - 1.0124 (1.0002-1.0247) (1)<br>MHDI – 1.2805 (1.0786-1.5203) | -                                                                | -                                                                |
| GM2                           | -                                                                                                   | -                                                                  | -                                                                | COM - 1.0084 (1.0043-1.0125) (0)                                 |
| GM3                           | -                                                                                                   | -                                                                  | RH - 1.0044 (1.0002-1.0085) (4)<br>MHDI – 1.0001 (1.0000-1.0001) | -                                                                |
| GW1                           | RH - 1.0285 (1.0051-1.0525) (3)<br>RH - 1.0371 (1.0150-1.0596) (4)<br>MHDI – 0.9991 (0.9987-0.9994) | TMIN - 1.0162 (1.0014-1.0311) (4)<br>MHDI – 0.9759 (0.7975-1.1942) | -                                                                | -                                                                |
| GW2                           | -                                                                                                   | -                                                                  | RH - 1.0040 (1.0005-1.0075) (2)<br>MHDI – 0.9999 (0.9999-0.9999) | RH - 1.0024 (1.0000-1.0047) (6)<br>MHDI – 0.7104 (0.4557-1.1073) |

TMAX - Maximum temperature; TMIN - Minimum temperature; RH - Relative humidity; COM - Component.

**Table S3.** Relative risk values with 95% confidence interval of hospitalization for respiratory diseases associated with explanatory variables for the groups and regions studied. The most significant lag are presented in parentheses.

| Groups | MRA                                | MRB                               | MRCA                              | MRCM                              |
|--------|------------------------------------|-----------------------------------|-----------------------------------|-----------------------------------|
| GM1    | RH - 1.0018 (1.0002-1.0033) (3)    | -                                 | -                                 | TMAX - 1.0090 (1.0063-1.0118) (0) |
|        | MHDI - 0.8737 (0.8006-0.9534)      |                                   |                                   | TMAX - 1.0025 (1.0004-1.0046) (6) |
|        |                                    |                                   |                                   | RH - 1.0023 (1.0006-1.0039) (0)   |
| GM2    | RH - 1.0017 (1.0000-1.0033) (3)    | -                                 | -                                 | MHDI - 0.9811 (0.8279-1.1625)     |
|        | MHDI - 1.2137 (1.1069-1.3308)      |                                   |                                   | -                                 |
| GM3    | RH - 1.0029 (1.0010-1.0048) (2)    | TMAX - 1.0269 (1.0103-1.0438) (0) | -                                 | TMAX - 1.0119 (1.0091-1.0147) (0) |
|        | RH - 1.0022 (1.0003-1.0041) (6)    | MHDI - 1.0569 (1.0087-1.2829)     |                                   | TMAX - 1.0034 (1.0000-1.0068) (4) |
|        | MHDI - 1.2060 (1.0887-1.3360)      |                                   |                                   | MHDI - 0.8426 (0.6787-1.0460)     |
| GW1    | TMAX - 1.0410 (1.0032- 1.0803) (1) | TMIN - 1.0136 (1.0037-1.0236) (0) | -                                 | TMAX - 1.0079 (1.0058-1.0102) (0) |
|        | MHDI - 0.0263 (0.00812-0.0845)     | MHDI - 1.1849 (1.0195-1.3774)     |                                   | RH - 1.0024 (1.0008-1.0039) (0)   |
| GW2    |                                    |                                   |                                   | MHDI - 1.7274 (1.5726-1.8974)     |
|        | RH - 1.0012 (1.0000-1.0023) (5)    | -                                 | TMIN - 1.0051 (1.0008-1.0094) (0) | TMAX - 1.0096 (1.0077-1.0115) (0) |
|        | MHDI - 0.9073 (0.8535-0.9644)      |                                   | MHDI - 1.0499 (1.0098-1.1154)     | TMAX - 1.0034 (1.0014-1.0055) (4) |
| GW3    |                                    |                                   |                                   | TMAX - 1.0025 (1.0007-1.0042) (6) |
|        |                                    | TMAX - 1.0286 (1.0125-1.0449) (0) |                                   | MHDI - 1.1839 (1.0917-1.2838)     |
|        | RH - 1.0026 (1.0007-1.0045) (5)    | RH - 1.0081 (1.0021-1.0141) (0)   | TMIN - 1.0094 (1.0016-1.0172) (0) | TMAX - 1.0042 (1.0013-1.0070) (0) |
|        | MHDI - 1.0404 (1.0186-1.2531)      | MHDI - 0.7028 (0.4361-1.1328)     | MHDI - 1.0704 (1.0395-1.2049)     | TMAX - 1.0043 (1.0010-1.0076) (4) |
|        |                                    |                                   |                                   | TMAX - 1.0031 (1.0002-1.0045) (6) |
|        |                                    |                                   |                                   | MHDI - 1.1572 (1.0227-1.3094)     |
| Groups | MRC                                | MRFB                              | MRF                               | MRG                               |
| GM1    | -                                  | -                                 | RH - 1.0025 (1.0000-1.0049) (5)   | -                                 |
|        |                                    |                                   | MHDI - 0.9745 (0.8592-1.1053)     |                                   |
| GM2    | -                                  | -                                 | RH - 1.0038 (1.0016-1.0059) (2)   | COM - 1.0025 (1.0000-1.0049) (0)  |
|        |                                    |                                   | RH - 1.0029 (1.0008-1.0051) (5)   |                                   |
|        |                                    |                                   | MHDI - 0.8887 (0.81187-0.9728)    |                                   |
| GM3    | TMAX - 1.0144 (1.0077-1.0212) (0)  | TMAX - 1.0135 (1.0029-1.0241) (0) | -                                 | -                                 |
|        | MHDI -0.8297 (0.7766-0.8865)       | MHDI - 1.1544 (1.0297-1.2941)     |                                   |                                   |



| GW1    | -                                                                                                                                                                           | TMAX - 1.0091 (1.0023-1.0161) (0)<br>RH - 1.0049 (1.0027-1.0072) (0)<br>MHDI – 1.0252 (1.0195-1.1023) | -                                                                                                                                         | -                                                                  |
|--------|-----------------------------------------------------------------------------------------------------------------------------------------------------------------------------|-------------------------------------------------------------------------------------------------------|-------------------------------------------------------------------------------------------------------------------------------------------|--------------------------------------------------------------------|
| GW2    | TMAX - 1.0059 (1.0019-1.0098) (0)<br>MHDI – 1.0658 (1.0233-1.1101)                                                                                                          | -                                                                                                     | -                                                                                                                                         | -                                                                  |
| GW3    | -                                                                                                                                                                           | TMAX - 1.0135 (1.0028-1.0257) (0)<br>MHDI – 1.1544 (1.0298-1.2941)                                    | TMAX - 1.0139 (1.0026-1.0252) (4)<br>MHDI – 1.3072 (1.0947-1.5609)                                                                        | -                                                                  |
| Groups | MRL                                                                                                                                                                         | MRM                                                                                                   | MRP                                                                                                                                       | MRPR                                                               |
| GM1    | TMIN - 1.0133 (1.0062-1.0204) (4)<br>MHDI – 1.5882 (1.5064-1.6745)                                                                                                          | -                                                                                                     | -                                                                                                                                         | TMAX - 1.0103 (1.0014-1.0193) (5)<br>MHDI – 1.2769 (1.1579-1.4082) |
| GM2    | RH - 1.0013 (1.0000-1.0025) (2)<br>MHDI – 0.8602 (0.8079-0.9158)                                                                                                            | -                                                                                                     | -                                                                                                                                         | -                                                                  |
| GM3    | TMAX - 1.0157 (1.0050-1.0265) (0)<br>MHDI – 1.1336 (1.0437-1.2313)                                                                                                          | -                                                                                                     | -                                                                                                                                         | -                                                                  |
| GW1    | RH - 1.0017 (1.0004-1.0029) (5)<br>MHDI – 0.7745 (0.7282-0.8236)                                                                                                            | -                                                                                                     | -                                                                                                                                         | TMAX - 1.0103 (1.0013-1.0194) (5)<br>MHDI – 1.2724 (1.1227-1.4421) |
| GW2    | TMAX - 1.0059 (1.0010-1.0108) (0)<br>RH - 1.0011 (1.0000-1.0021) (2)<br>RH - 1.0012 (1.0001-1.0022) (5)<br>RH - 1.0016 (1.0006-1.0027) (6)<br>MHDI – 0.7886 (0.7475-0.8319) | -                                                                                                     | -                                                                                                                                         | -                                                                  |
| GW3    | RH - 1.0015 (1.0000-1.0031) (1)<br>MHDI – 2.3187 (2.1684-2.4795)                                                                                                            | -                                                                                                     | -                                                                                                                                         | TMAX - 1.0196 (1.0011-1.0385) (0)<br>MHDI – 1.2563 (1.0429-1.5134) |
| Groups | MRPB                                                                                                                                                                        | MRTB                                                                                                  | MRT                                                                                                                                       | MRU                                                                |
| GM1    | -                                                                                                                                                                           | -                                                                                                     | -                                                                                                                                         | RH - 1.0018 (1.0004-1.0032) (5)<br>MHDI – 1.0000 (1.0000-1.0000)   |
| GM2    | TMAX - 1.0154 (1.0061-1.0247) (0)<br>MHDI – 1.3314 (1.2005-1.4765)                                                                                                          | -                                                                                                     | TMAX - 1.0107 (1.0033-1.01823) (0)<br>RH - 1.0022 (1.0002-1.0042) (1)<br>RH - 1.0025 (1.0005-1.0045) (4)<br>MHDI – 0.9753 (0.8619-1.1035) | -                                                                  |

|     |                                   |                                   |                                   |   |
|-----|-----------------------------------|-----------------------------------|-----------------------------------|---|
|     | RH - 1.0029 (1.0001-1.0056) (4)   |                                   |                                   |   |
| GM3 | RH - 1.0039 (1.0011-1.0067) (5)   | -                                 | -                                 | - |
|     | MHDI – 0.6688 (0.5725-0.7813)     |                                   |                                   |   |
| GW2 | TMIN - 1.0015 (1.0006-1.0023) (0) | -                                 | TMAX - 1.0098 (1.0038-1.0159) (0) | - |
|     | MHDI – 1.0931 (1.0599-1.1961)     |                                   | MHDI – 0.8222 (0.7718-0.8758)     |   |
| GW3 | TMAX - 1.0264 (1.0109-1.0422) (0) | TMAX - 1.0121 (1.0051-1.0191) (0) | TMAX - 1.0106 (1.0001-1.0211) (0) | - |
|     | MHDI – 1.3334 (1.1449-1.5529)     | MHDI – 0.8435 (0.7600-0.9360)     | MHDI – 1.3921 (1.2622-1.5354)     |   |

---

TMAX - Maximum temperature; TMIN - Minimum temperature; RH - Relative humidity; COM - Component.

**Table S4.** Relative risk values with 95% confidence interval of death for respiratory diseases associated with explanatory variables for the groups and regions studied. The most significant lag are presented in parentheses.

| Groups | MRA                                                                | MRB                                                                                                                                    | MRCA                                                               | MRCM                                                               |
|--------|--------------------------------------------------------------------|----------------------------------------------------------------------------------------------------------------------------------------|--------------------------------------------------------------------|--------------------------------------------------------------------|
| GM1    | -                                                                  | -                                                                                                                                      | TMIN - 1.0268 (1.0009-1.0532) (7)<br>MHDI – 0.9352 (0.6428-1.3606) | TMIN - 1.0223 (1.0016-1.0435) (5)<br>MHDI – 0.1504 (0.0917-0.2469) |
| GW1    | TMAX - 1.0410 (1.0032-1.0803) (1)<br>MHDI – 0.2629 (0.0817-0.8457) | RH - 1.0222 (1.0074-1.0373) (0)<br>RH - 1.0155 (1.0004-1.0309) (2)<br>RH - 1.0166 (1.0015-1.0319) (5)<br>MHDI – 0.5742 (0.3546-0.9295) | TMAX - 1.0316 (1.0056-1.0582) (2)<br>MHDI – 0.6366 (0.4219-0.9606) | -                                                                  |
| GW2    | -                                                                  | -                                                                                                                                      | -                                                                  | TMIN - 1.0129 (1.0004-1.0254) (5)<br>MHDI – 0.3954 (0.2906-0.5381) |
| GW3    | TMIN – 1.0266 (1.0057-1.0480) (1)<br>MHDI – 1.3713 (1.1419-2.9291) | -                                                                                                                                      | -                                                                  | -                                                                  |
| Groups | MRC                                                                | MRFB                                                                                                                                   | RMF                                                                | MRG                                                                |
| GM1    | -                                                                  | -                                                                                                                                      | TMIN – 1.0370 (1.0137-1.0610) (3)<br>MHDI – 1.9281 (1.2524-1.4726) | -                                                                  |
| Groups | MRL                                                                | MRM                                                                                                                                    | MRP                                                                | MRPR                                                               |
| GM1    | TMIN - 1.0049 (1.0036-1.0163) (0)<br>MHDI – 1.0055 (1.0191-1.0222) | TMIN - 1.0420 (1.0197-1.0649) (4)<br>MHDI – 0.9181 (0.7551-1.1164)                                                                     | TMAX - 1.0534 (1.0009-1.1086) (6)<br>MHDI – 1.0823 (1.0594-1.9732) | -                                                                  |
| GM2    | -                                                                  | -                                                                                                                                      | -                                                                  | -                                                                  |
| GM3    | -                                                                  | -                                                                                                                                      | TMIN - 1.0519 (1.0101-1.0956) (5)<br>MHDI – 1.7307 (1.1152-2.6858) | -                                                                  |
| GW1    | -                                                                  | TMIN - 1.0742 (1.0306-1.1196) (0)<br>MHDI – 1.0086 (1.0061-1.0366)                                                                     | -                                                                  | -                                                                  |
| GW2    | TMIN - 1.0006 (1.0000-1.0015) (0)<br>MHDI – 1.0671 (1.0266-1.1262) | -                                                                                                                                      | -                                                                  | -                                                                  |
| Groups | MRPB                                                               | MRTB                                                                                                                                   | MRT                                                                | MRU                                                                |
| GM1    | -                                                                  | -                                                                                                                                      | TMAX - 1.0225 (1.0017-1.0438) (7)<br>MHDI – 0.7971 (0.6519-0.9746) | -                                                                  |
| GM2    | -                                                                  | -                                                                                                                                      | -                                                                  | COM - 1.0084 (1.0043-1.0125) (0)                                   |

|     |   |                                 |                                   |                                 |
|-----|---|---------------------------------|-----------------------------------|---------------------------------|
| GW1 | - | RH - 1.0116 (1.0000-1.0232) (0) | -                                 | -                               |
|     |   | MHDI - 1.7569 (1.3965-2.2104)   |                                   |                                 |
| GW2 | - | RH - 1.0064 (1.0006-1.0121) (0) | TMAX - 1.0188 (1.0014-1.0365) (1) | -                               |
|     |   | MHDI - 1.0001 (1.0001-1.0001)   | MHDI - 0.7281 (0.3983-0.0.9133)   |                                 |
| GW3 | - | -                               | -                                 | RH - 1.0052 (1.0008-1.0096) (4) |
|     |   |                                 |                                   | MHDI - 1.0002 (1.0001-1.0002)   |

---

TMAX - Maximum temperature; TMIN - Minimum temperature; RH - Relative humidity; COM - Component.

**Table S5.** Relative risk values with 95% confidence interval of hospitalization for mental illnesses and disorders associated with explanatory variables for the groups and regions studied. The most significant lag are presented in parentheses.

| Groups | MRB                                                                                                                                                                                | MRCA                                                                                                                                         | MRCM                                                                                                                                                                              |
|--------|------------------------------------------------------------------------------------------------------------------------------------------------------------------------------------|----------------------------------------------------------------------------------------------------------------------------------------------|-----------------------------------------------------------------------------------------------------------------------------------------------------------------------------------|
| GM1    | TMAX - 1.0108 (1.0103-1.0889) (0)<br>MHDI - 1.2719 (1.1952-1.3117)                                                                                                                 | -                                                                                                                                            | TMAX - 1.0062 (1.0003-1.0159) (0)<br>TMIN - 1.0064 (1.0052-1.0163) (3)<br>MHDI - 1.4724 (1.0304-2.1039)                                                                           |
| GW1    | -                                                                                                                                                                                  | TMAX - 1.0442 (1.0007-1.0897) (0)<br>TMAX - 1.0705 (1.0209-1.1225) (4)<br>MHDI - 0.2573 (0.1348-0.4909)                                      | TMAX - 1.0134 (1.0034-1.0292) (0)<br>MHDI - 0.9378 (0.5431-1.6195)                                                                                                                |
| GW2    | -                                                                                                                                                                                  | TMAX - 1.1651 (1.0607-1.2797) (5)<br>MHDI - 0.6751 (0.2091-0.2172)                                                                           | TMAX - 1.0112 (1.0100-1.0289) (0)<br>TMAX - 1.0217 (1.0019-1.0496) (1)<br>TMAX - 1.0252 (1.0125-1.0552) (2)<br>TMAX - 1.0213 (1.0112-1.0480) (3)<br>MHDI - 1.1839 (1.0917-1.2838) |
| Groups | MRC                                                                                                                                                                                | MRFB                                                                                                                                         | RMF                                                                                                                                                                               |
| GM1    | TMIN - 1.0826 (1.0638-1.1017) (0)<br>TMIN - 1.0134 (1.0025-1.0245) (5)<br>TMIN - 1.0142 (1.0036-1.0249) (6)<br>MHDI - 0.5705 (0.4795-0.6788)                                       | TMIN - 1.0013 (1.0011-1.0070) (0)<br>MHDI - 1.0004 (1.0002-1.0006)                                                                           | -                                                                                                                                                                                 |
| GM2    | TMIN - 1.1019 (1.0682-1.1367) (0)<br>TMIN - 1.0293 (1.0064-1.0528) (2)<br>TMIN - 1.0240 (1.0007-1.0479) (5)<br>TMIN - 1.0324 (1.00915-1.0561) (6)<br>MHDI - 0.5156 (0.4054-0.6555) | -                                                                                                                                            | TMAX - 1.0446 (1.0079-1.0825) (2)<br>MHDI - 0.9211 (0.3511-2.4165)                                                                                                                |
| GM3    | TMIN - 1.0866 (1.0149-1.1633) (0)<br>TMIN - 1.1073 (1.0062-1.2186) (4)<br>MHDI - 1.1479 (1.8937-1.9582)                                                                            | -                                                                                                                                            | -                                                                                                                                                                                 |
| GW1    | TMIN - 1.0541 (1.0404-1.0680) (0)<br>TMIN - 1.0156 (1.0047-1.0266) (2)<br>MHDI - 0.8097 (0.7161-0.9155)                                                                            | -                                                                                                                                            | TMAX - 1.0619 (1.0169-1.1089) (0)<br>RH - 1.0253 (1.0115-1.0394) (0)<br>MHDI - 1.1631 (1.0774-1.7481)                                                                             |
| GW2    | TMIN - 1.1194 (1.0892-1.1505) (0)<br>TMIN - 1.0239 (1.0014-1.0468) (5)<br>MHDI - 0.4352 (0.3398-0.5575)                                                                            | -                                                                                                                                            | -                                                                                                                                                                                 |
| GW3    | TMIN - 1.0248 (1.0123-1.0964) (0)<br>MHDI - 1.8476 (1.0912-3.7441)                                                                                                                 | -                                                                                                                                            | -                                                                                                                                                                                 |
| Groups | RMG                                                                                                                                                                                | MRL                                                                                                                                          | MRM                                                                                                                                                                               |
| GM1    | -                                                                                                                                                                                  | TMIN - 1.1331 (1.0399-1.2347) (0)<br>TMIN - 1.0858 (1.0283-1.1465) (5)<br>TMIN - 1.0705 (1.0124-1.1318) (6)<br>MHDI - 1.0747 (1.0459-1.5483) | TMIN - 1.1060 (1.0388-1.1775) (0)<br>MHDI - 1.4217 (1.3575-1.6149)                                                                                                                |
| GM2    | -                                                                                                                                                                                  | -                                                                                                                                            | TMIN - 1.0655 (1.0034-1.1314) (0)<br>MHDI - 1.1439 (1.0781-1.9076)                                                                                                                |
| GW1    | -                                                                                                                                                                                  | TMIN - 1.0697 (1.0174-1.1246) (0)<br>MHDI - 1.4241 (1.0019-1.7012)                                                                           | TMIN - 1.034 (1.0053-1.0639) (0)<br>MHDI - 2.4199 (1.6039-3.6509)                                                                                                                 |

| GW2                                                                             | TMAX - 1.0457 (1.0138-1.0787) (5)<br>MHDI – 2.2524 (1.0491-4.8362)                                      | -                                 | - |
|---------------------------------------------------------------------------------|---------------------------------------------------------------------------------------------------------|-----------------------------------|---|
| Groups                                                                          | MRPR                                                                                                    | MRTB                              |   |
| GM1                                                                             | TMIN - 1.0241 (1.0056-1.0428) (0)<br>MHDI – 1.2563 (1.0429-1.5134)                                      | RH - 1.0163 (1.0063-1.0264) (0)   |   |
|                                                                                 |                                                                                                         | RH - 1.0198 (1.0096-1.0302) (2)   |   |
|                                                                                 |                                                                                                         | RH - 1.0149 (1.0045-1.0247) (4)   |   |
|                                                                                 |                                                                                                         | MHDI – 2.1434 (1.1186-4.1068)     |   |
| GM2                                                                             | -                                                                                                       | TMAX - 1.0744 (1.0061-1.1474) (0) |   |
|                                                                                 |                                                                                                         | TMIN - 1.0459 (1.0137-1.0790) (3) |   |
|                                                                                 |                                                                                                         | RH - 1.0197 (1.0094-1.0301) (2)   |   |
|                                                                                 |                                                                                                         | RH - 1.0156 (1.0051-1.0261) (4)   |   |
| GW1                                                                             | TMIN - 1.0504 (1.0009-1.1025) (0)<br>TMIN - 1.0511 (1.0022-1.1024) (5)<br>MHDI – 0.6217 (0.3909-0.9886) | MHDI – 2.1109 (1.1037-4.0371)     |   |
|                                                                                 |                                                                                                         | TMIN - 1.0481 (1.0162-1.0811) (5) |   |
|                                                                                 |                                                                                                         | MHDI – 2.9775 (1.4448-6.1361)     |   |
|                                                                                 |                                                                                                         |                                   |   |
| GW2                                                                             | -                                                                                                       | TMIN - 1.0864 (1.0301-1.1457) (0) |   |
|                                                                                 |                                                                                                         | MHDI – 1.3464 (0.6492-1.8489)     |   |
| TMAX - Maximum temperature; TMIN - Minimum temperature; RH - Relative Humidity. |                                                                                                         |                                   |   |



| Cardiovascular diseases |                    |            |          |          |          | Respiratory diseases |            |          |          |          |  |
|-------------------------|--------------------|------------|----------|----------|----------|----------------------|------------|----------|----------|----------|--|
| Apucarana               |                    |            |          |          |          |                      |            |          |          |          |  |
| Group                   | Selected variables | AIC values |          |          |          | Selected variables   | AIC values |          |          |          |  |
|                         |                    | PO         | BN       | ZAP      | ZANBI    |                      | PO         | BN       | ZAP      | ZANBI    |  |
| GM1                     | RH                 | 15699.18   | 15674.73 | 17050.27 | 17051.68 | RH                   | 13903.86   | 13898.21 | 14994.3  | 14996.31 |  |
| GM2                     | TMAX+TMIN+RH       | 21944.92   | 21663.0  | 24541.99 | 23533.13 | TMAX+TMIN+RH         | 20918.53   | 20579.33 | 60094.6  | 22243.95 |  |
| GM3                     | TMAX               | 10857.06   | 10849.3  | 11570.01 | 11569.31 | RH                   | 12305.98   | 11488.46 | 12307.31 | 12308.73 |  |
| GW1                     | TMIN               | 3604.705   | 3602.583 | 3614.711 | 3616.711 | TMAX                 | 1342.09    | 1344.09  | 1495.012 | 1497.011 |  |
| GW2                     | TMAX+TMIN+RH       | 21491.53   | 21217.33 | 22015.13 | 21976.61 | RH                   | 18846.48   | 18756.46 | 20744.31 | 20713.84 |  |
| GW3                     | TMAXTMIN+RH        | 11332.18   | 11326.89 | 12253.26 | 12178.61 | RH                   | 11782.6    | 11765.32 | 12563.9  | 12565.9  |  |
| Bandeirantes            |                    |            |          |          |          |                      |            |          |          |          |  |
| Group                   | Selected variables | AIC values |          |          |          | Selected variables   | AIC values |          |          |          |  |
|                         |                    | PO         | BN       | ZAP      | ZANBI    |                      | PO         | BN       | ZAP      | ZANBI    |  |
| GM1                     | TMIN               | 10933.92   | 10935.92 | 8786.432 | 8812.159 | TMIN                 | 14214.34   | 14204.11 | 15796.28 | 15796.73 |  |
| GM2                     | TMIN               | 20512.5    | 20481.71 | 23382.89 | 23376.3  | TMIN                 | 17685.17   | 17658.16 | 19932.98 | 19931.38 |  |
| GM3                     | RH                 | 12026.65   | 12025.75 | 13143.05 | 13145.05 | TMAX+TMIN+RH         | 10041.09   | 10036.27 | 10891.12 | 10887.22 |  |
| GW1                     | TMIN               | 16626.97   | 16618.0  | 18894.13 | 18895.16 | TMIN                 | 15232.73   | 15195.9  | 17028.89 | 17021.04 |  |
| GW2                     | RH                 | 20582.75   | 20545.23 | 23471.16 | 23457.41 | TMIN                 | 17970.52   | 17935.93 | 20168.63 | 20154.58 |  |
| GW3                     | RH                 | 5511.684   | 5513.684 | 3429.884 | 3431.884 | TMAX+TMIN+RH         | 10657.51   | 10643.89 | 11561.13 | 11552.02 |  |
| Cascavel                |                    |            |          |          |          |                      |            |          |          |          |  |
| Group                   | Selected variables | AIC values |          |          |          | Selected variables   | AIC values |          |          |          |  |
|                         |                    | PO         | BN       | ZAP      | ZANBI    |                      | PO         | BN       | ZAP      | ZANBI    |  |
| GM1                     | TMIN               | 19103.14   | 19070.97 | 21651.04 | 21652.62 | TMIN                 | 18564.05   | 18504.42 | 20871.41 | 20856.27 |  |
| GM2                     | COM                | 23415.81   | 23368.37 | 26908.51 | 26900.96 | COM                  | 23055.4    | 26275.86 | 26304.63 | 22960.91 |  |
| GM3                     | TMAX               | 12516.63   | 12512.18 | 13638.61 | 13639.68 | COM                  | 13588.03   | 14830.67 | 14829.54 | 13577.77 |  |
| GW1                     | TMAX               | 21783.02   | 21561.75 | 24939.05 | 24812.44 | TMIN                 | 19741.84   | 19657.96 | 22318.5  | 22284.72 |  |
| GW2                     | TMAX               | 23577.72   | 23443.7  | 26977.91 | 26965.23 | TMIN                 | 22465.77   | 22369.87 | 25779.82 | 25736.32 |  |
| GW3                     | RH                 | 13909.16   | 13895.32 | 15191.61 | 15200.89 | TMIN                 | 13434.52   | 13414.99 | 14651.61 | 14652.68 |  |

| Group | Selected variables | AIC values |          |          |          | Selected variables | AIC values |          |          |          |  |
|-------|--------------------|------------|----------|----------|----------|--------------------|------------|----------|----------|----------|--|
|       |                    | PO         | BN       | ZAP      | ZANBI    |                    | PO         | BN       | ZAP      | ZANBI    |  |
| GM1   | TMAX+TMIN+RH       | 22156.22   | 24958.1  | 25775.12 | 25755.26 | TMAX+TMIN+RH       | 18669.08   | 18666.21 | 21600.05 | 21598.43 |  |
| GM2   | TMAX+TMIN+RH       | 32028.03   | 30973.69 | 30949.16 | 30878.11 | TMIN               | 9215.204   | 9217.204 | 9354.872 | 9354.926 |  |
| GM3   | TMAX+TMIN+RH       | 15435.53   | 15436.96 | 17424.19 | 17424.94 | TMAX+TMIN+RH       | 14701.35   | 14695.12 | 16442.47 | 16440.65 |  |

| GW1               | TMAX+TMIN+RH       | 23129.41   | 23040.49 | 26989.4  | 26942.46 | TMAX+TMIN+RH       | 20596.52   | 20543.08 | 23873.5  | 23833.05 |
|-------------------|--------------------|------------|----------|----------|----------|--------------------|------------|----------|----------|----------|
| GW2               | TMAX+TMIN+RH       | 31505.48   | 30620.92 | 30661.47 | 30615.79 | TMAX+TMIN+RH       | 23397.74   | 23303.58 | 27221.09 | 27202.45 |
| GW3               | TMAX               | 16581.91   | 16581.89 | 18841.12 | 18840.49 | TMAX+TMIN+RH       | 14757.29   | 14756.55 | 16528.85 | 16530.29 |
| Curitiba          |                    |            |          |          |          |                    |            |          |          |          |
| Group             | Selected variables | AIC values |          |          |          | Selected variables | AIC values |          |          |          |
|                   |                    | PO         | BN       | ZAP      | ZANBI    |                    | PO         | BN       | ZAP      | ZANBI    |
| GM1               | RH                 | 38518.1    | 36846.32 | 41870.91 | 40956.02 | TMIN               | 27582.62   | 27476.12 | 32029.13 | 31988.3  |
| GM2               | RH                 | 41525.73   | 39178.15 | 44808.98 | 43342.15 | TMIN               | 20055.44   | 20051.14 | 20133.68 | 20132.48 |
| GM3               | RH                 | 24106.36   | 24037.07 | 27642.72 | 27638.45 | TMAX+TMIN+RH       | 20376.75   | 20349.68 | 23285.13 | 23277.16 |
| GW1               | TMAX+TMIN+RH       | 38745.86   | 37022.43 | 41906.05 | 40941.78 | TMIN               | 28716.94   | 28441.8  | 33070.1  | 32916.76 |
| GW2               | TMIN               | 26380.45   | 26366.94 | 26413.9  | 26409.0  | TMAX+TMIN+RH       | 39833.67   | 31751.07 | 37648.53 | 36532.6  |
| GW3               | RH                 | 24106.36   | 24037.07 | 27642.72 | 27638.45 | TMIN               | 22300.75   | 25295.31 | 25452.84 | 25458.32 |
| Francisco Beltrão |                    |            |          |          |          |                    |            |          |          |          |
| Group             | Selected variables | AIC values |          |          |          | Selected variables | AIC values |          |          |          |
|                   |                    | PO         | BN       | ZAP      | ZANBI    |                    | PO         | BN       | ZAP      | ZANBI    |
| GM1               | RH                 | 15186.76   | 15167.93 | 16945.88 | 16944.64 | TMIN               | 16542.85   | 16528.96 | 18718.07 | 18719.34 |
| GM2               | RH                 | 19935.39   | 19900.79 | 22629.01 | 22629.31 | TMIN               | 22421.51   | 22374.14 | 25899.39 | 25880.31 |
| GM3               | TMAX+TMIN+RH       | 12238.85   | 12236.85 | 13361.97 | 13363.97 | TMAX+TMIN+RH       | 12539.34   | 12536.85 | 13767.04 | 13767.76 |
| GW1               | RH                 | 17418.87   | 17277.54 | 19785.37 | 19710.94 | TMAX+TMIN+RH       | 18334.83   | 18308.72 | 21097.57 | 21093.13 |
| GW2               | RH                 | 20557.24   | 20513.98 | 23441.37 | 23437.11 | TMIN               | 22421.51   | 22374.14 | 25899.39 | 25880.31 |
| GW3               | TMAX+TMIN+RH       | 12238.85   | 12236.85 | 13361.97 | 13363.97 | TMAX+TMIN+RH       | 12539.34   | 12555.99 | 13767.04 | 13767.76 |
| Foz do Iguaçu     |                    |            |          |          |          |                    |            |          |          |          |
| Group             | Selected variables | AIC values |          |          |          | Selected variables | AIC values |          |          |          |
|                   |                    | PO         | BN       | ZAP      | ZANBI    |                    | PO         | BN       | ZAP      | ZANBI    |
| GM1               | TMAX               | 13794.96   | 13780.78 | 14418.9  | 14417.79 | RH                 | 12130.99   | 12118.39 | 12713.65 | 12712.64 |
| GM2               | TMIN               | 15217.72   | 15196.56 | 15965.73 | 15960.82 | TMAX+TMIN+RH       | 14254.49   | 14235.33 | 15038.58 | 15036.72 |
| GM3               | TMAX               | 5064.516   | 5060.801 | 5182.55  | 5182.7   | TMIN               | 6890.752   | 6889.99  | 7083.937 | 7078.455 |
| GW1               | TMIN               | 15155.14   | 14967.61 | 15931.25 | 15894.32 | TMAX+TMIN+RH       | 11528.31   | 11506.85 | 12108.19 | 12107.24 |
| GW2               | TMIN               | 14264.2    | 14229.91 | 14939.7  | 14932.86 | TMAX               | 12878.27   | 12825.66 | 13408.91 | 13408.06 |

| GW3        | RH                 | 6500.074   | 6496.23  | 6689.168 | 6684.461 | TMAX               | 6811.003   | 6801.001 | 7013.205 | 7002.774 |
|------------|--------------------|------------|----------|----------|----------|--------------------|------------|----------|----------|----------|
| Guarapuava |                    |            |          |          |          |                    |            |          |          |          |
| Group      | Selected variables | AIC values |          |          |          | Selected variables | AIC values |          |          |          |
|            |                    | PO         | BN       | ZAP      | ZANBI    |                    | PO         | BN       | ZAP      | ZANBI    |
| GM1        | TMAX               | 18709.03   | 18697.3  | 21334.38 | 21333.01 | COM                | 17039.04   | 17032.85 | 19150.43 | 19151.86 |
| GM2        | COM                | 21849.62   | 21841.3  | 25240.83 | 25234.55 | COM                | 21645.53   | 21615.84 | 24780.62 | 24803.81 |
| GM3        | RH                 | 11538.69   | 11530.32 | 12530.36 | 12532.36 | COM                | 14508.37   | 14706.75 | 13928.99 | 13828.35 |
| GW1        | RH                 | 23064.04   | 22862.57 | 24830.28 | 23010.05 | COM                | 18907.96   | 18861.8  | 21361.34 | 21365.34 |
| GW2        | COM                | 22956.31   | 22883.89 | 26423.89 | 26388.42 | COM                | 23006.48   | 22882.14 | 26206.44 | 26131.58 |
| GW3        | TMAX               | 13887.81   | 13885.29 | 15320.63 | 15305.28 | COM                | 13425.26   | 13416.8  | 14717.61 | 14715.72 |
| Londrina   |                    |            |          |          |          |                    |            |          |          |          |
| Group      | Selected variables | AIC values |          |          |          | Selected variables | AIC values |          |          |          |
|            |                    | PO         | BN       | ZAP      | ZANBI    |                    | PO         | BN       | ZAP      | ZANBI    |
| GM1        | TMIN               | 24187.7    | 24077.82 | 41788.5  | 41464.08 | TMIN               | 20712.68   | 20667.63 | 23728.12 | 23706.43 |
| GM2        | RH                 | 28989.78   | 28574.92 | 47285.15 | 46755.27 | TMAX+TMIN+RH       | 25588.42   | 25467.23 | 29440.99 | 29400.54 |
| GM3        | RH                 | 10905.32   | 59835.48 | 23258.93 | 23255.65 | TMAX+TMIN+RH       | 19745.33   | 18075.82 | 20166.15 | 20162.52 |
| GW1        | TMAX               | 1342.09    | 1344.09  | 1495.012 | 1497.011 | TMAX+TMIN+RH       | 20599.22   | 20528.23 | 23543.54 | 23505.57 |
| GW2        | RH                 | 28412.67   | 28028.93 | 46646.51 | 46128.43 | TMAX+TMIN+RH       | 24636.88   | 24492.72 | 28155.94 | 28110.02 |
| GW3        | TMAX               | 13573.27   | 13575.27 | 27479.09 | 27461.94 | TMAX+TMIN+RH       | 18809.61   | 18755.31 | 21046.24 | 21032.78 |
| Maringá    |                    |            |          |          |          |                    |            |          |          |          |
| Group      | Selected variables | AIC values |          |          |          | Selected variables | AIC values |          |          |          |
|            |                    | PO         | BN       | ZAP      | ZANBI    |                    | PO         | BN       | ZAP      | ZANBI    |
| GM1        | TMAX               | 21741.84   | 21697.29 | 25003.37 | 24996.62 | TMAX+TMIN+RH       | 21380.37   | 20385.37 | 24870.81 | 24849.61 |
| GM2        | TMAX+TMIN+RH       | 25978.08   | 24536.20 | 30451.33 | 30125.35 | TMAX+TMIN+RH       | 24639.33   | 24547.24 | 28585.77 | 28558.53 |
| GM3        | TMAX+TMIN+RH       | 15369.47   | 15351.63 | 17070.72 | 17071.1  | TMAX+TMIN+RH       | 16145.08   | 16123.23 | 18026.67 | 18016.29 |
| GW1        | TMAX+TMIN+RH       | 23089.01   | 25966.98 | 26719.27 | 26659.51 | TMAX+TMIN+RH       | 21756.62   | 21643.46 | 25360.59 | 25298.56 |
| GW2        | TMAX+TMIN+RH       | 25761.3    | 25673.41 | 29915.41 | 29891.06 | TMAX+TMIN+RH       | 23691.82   | 23598.58 | 27447.59 | 27412.89 |
| GW3        | TMAX+TMIN+RH       | 17305.48   | 17275.88 | 19441.62 | 19500.58 | TMAX+TMIN+RH       | 16574.7    | 16548.15 | 18446.05 | 18459.13 |
| Palmas     |                    |            |          |          |          |                    |            |          |          |          |
| Group      | Selected variables | AIC values |          |          |          | Selected variables | AIC values |          |          |          |

|                |                    | PO         | BN       | ZAP      | ZANBI    |                    | PO         | BN       | ZAP      | ZANBI    |
|----------------|--------------------|------------|----------|----------|----------|--------------------|------------|----------|----------|----------|
| GM1            | TMIN               | 7562.83    | 7562.537 | 8135.253 | 8137.246 | TMAX               | 6380.737   | 6381.298 | 6822.785 | 6814.633 |
| GM2            | TMAX               | 3812.296   | 3813.709 | 3909.234 | 387945.1 | TMIN               | 2326.078   | 2329.542 | 2332.508 | 3148.899 |
| GM3            | RH                 | 3069.56    | 3071.56  | 3165.32  | 3305.9   | TMAX               | 3353.962   | 3354.655 | 3452.65  | 3585.079 |
| GW1            | RH                 | 8493.989   | 8490.58  | 9249.039 | 9247.691 | TMIN               | 7371.234   | 7365.963 | 7955.075 | 7947.886 |
| GW2            | RH                 | 9334.425   | 9327.894 | 10130.15 | 10129.52 | TMIN               | 9543.843   | 9540.6   | 10334.38 | 10334.56 |
| GW3            | TMAX               | 3445.963   | 3446.938 | 3601.695 | 3623.075 | TMIN               | 3626.261   | 3626.987 | 3842.02  | 3863.115 |
| Paranaguá      |                    |            |          |          |          |                    |            |          |          |          |
| Group          | Selected variables | AIC values |          |          |          | Selected variables | AIC values |          |          |          |
|                |                    | PO         | BN       | ZAP      | ZANBI    |                    | PO         | BN       | ZAP      | ZANBI    |
| GM1            | RH                 | 8868.3     | 8870.233 | 6696.407 | 6693.517 | TMAX+TMIN+RH       | 10543.6    | 10798.69 | 10800.7  | 10792.05 |
| GM2            | TMAX+TMIN+RH       | 19759.9    | 17880.64 | 20311.91 | 20308.74 | TMIN               | 4871.838   | 4841.075 | 4870.825 | 4872.583 |
| GM3            | RH                 | 6763.586   | 7240.535 | 7237.417 | 7239.394 | TMIN               | 5470.539   | 5472.525 | 5754.558 | 5761.065 |
| GW1            | TMAX               | 15684.14   | 13917.04 | 15686.12 | 15685.33 | TMAX+TMIN+RH       | 9864.754   | 9865.542 | 10790.06 | 10792.05 |
| GW2            | TMAX+TMIN+RH       | 16108.72   | 16105.82 | 18318.03 | 18313.28 | TMIN               | 11700.31   | 11697.32 | 12975.44 | 12976.97 |
| GW3            | TMIN               | 7492.802   | 7487.594 | 7979.815 | 7980.716 | TMAX+TMIN+RH       | 6831.952   | 6498.887 | 6946.979 | 6948.586 |
| Pato Branco    |                    |            |          |          |          |                    |            |          |          |          |
| Group          | Selected variables | AIC values |          |          |          | Selected variables | AIC values |          |          |          |
|                |                    | PO         | BN       | ZAP      | ZANBI    |                    | PO         | BN       | ZAP      | ZANBI    |
| GM1            | TMIN               | 12349.78   | 12295.48 | 13447.46 | 13449.98 | TMIN               | 13433.04   | 13404.71 | 14723.42 | 14726.39 |
| GM2            | RH                 | 16010.36   | 15972.81 | 17841.98 | 17846.22 | TMAX+TMIN+RH       | 19546.6    | 19483.21 | 22027.99 | 22021.04 |
| GM3            | RH                 | 6687.975   | 6667.569 | 7065.247 | 7067.537 | RH                 | 10052.75   | 9995.723 | 10735.37 | 10761.8  |
| GW1            | TMAX+TMIN+RH       | 14672.14   | 14246.4  | 15850.83 | 15679.22 | TMIN               | 15372.7    | 15331.87 | 17169.63 | 17165.54 |
| GW2            | RH                 | 16039.78   | 15988.04 | 17726.93 | 17727.08 | TMIN               | 19129.07   | 19062.27 | 21451.42 | 21447.68 |
| GW3            | TMAX               | 8609.233   | 8577.537 | 9246.103 | 9221.089 | TMAX+TMIN+RH       | 10392.99   | 10370.94 | 11188.32 | 11188.61 |
| Telêmaco Borba |                    |            |          |          |          |                    |            |          |          |          |
| Group          | Selected variables | AIC values |          |          |          | Selected variables | AIC values |          |          |          |
|                |                    | PO         | BN       | ZAP      | ZANBI    |                    | PO         | BN       | ZAP      | ZANBI    |
| GM1            | RH                 | 21679.32   | 21630.1  | 25015.14 | 25007.18 | TMIN               | 18279.25   | 18264.54 | 20927.71 | 20928.63 |
| GM2            | RH                 | 25808.74   | 25680.59 | 29567.76 | 29535.57 | TMIN               | 22257.78   | 22220.48 | 25668.2  | 25660.88 |

|     |              |          |          |          |          |              |          |          |          |          |
|-----|--------------|----------|----------|----------|----------|--------------|----------|----------|----------|----------|
| GM3 | RH           | 13852    | 13842.54 | 15262.16 | 15263.53 | TMIN         | 13752.13 | 13750.94 | 15287.15 | 15285.68 |
| GW1 | TMAX+TMIN+RH | 22990.25 | 22939.78 | 26630.64 | 26625.64 | TMIN         | 20872.45 | 20834.57 | 24015.6  | 24009.59 |
| GW2 | RH           | 26094.35 | 26012.7  | 30137.14 | 30111.13 | TMIN         | 27877.23 | 23934.59 | 27981.31 | 27743.38 |
| GW3 | TMAX         | 14848.73 | 14847.62 | 16629.12 | 16631.12 | TMAX+TMIN+RH | 14037.01 | 14031.08 | 15524.82 | 15524.88 |

### Toledo

| Group | Selected variables | AIC values |          |          |          | Selected variables | AIC values |          |          |          |
|-------|--------------------|------------|----------|----------|----------|--------------------|------------|----------|----------|----------|
|       |                    | PO         | BN       | ZAP      | ZANBI    |                    | PO         | BN       | ZAP      | ZANBI    |
| GM1   | TMAX               | 16280.05   | 16248.37 | 17943.91 | 17936.95 | TMIN               | 15764.5    | 15748.49 | 17277.38 | 17277.2  |
| GM2   | TMAX+TMIN+RH       | 20513.74   | 20487.23 | 23020.11 | 23008.73 | TMAX+TMIN+RH       | 20098.88   | 20076.73 | 22227.44 | 22217.44 |
| GM3   | TMAX               | 10960.62   | 10959.78 | 11767.73 | 11767.42 | RH                 | 11445.76   | 11444.92 | 12334.72 | 12336.72 |
| GW1   | TMAX               | 17700.77   | 17614.61 | 19746.34 | 19702.33 | TMIN               | 17114.27   | 17075.54 | 18920.44 | 18910.44 |
| GW2   | TMAX+TMIN+RH       | 20484.11   | 20461.49 | 22869.77 | 22859.03 | TMAX+TMIN+RH       | 18938.11   | 18901.41 | 20961.87 | 20944.11 |
| GW3   | TMAX+TMIN+RH       | 12707.49   | 12709.38 | 13828.34 | 13830.34 | TMAX+TMIN+RH       | 11140.72   | 11136.56 | 11962.81 | 11964.81 |

### Umuarama

| Group | Selected variables | AIC values |          |          |          | Selected variables | AIC values |          |          |          |
|-------|--------------------|------------|----------|----------|----------|--------------------|------------|----------|----------|----------|
|       |                    | PO         | BN       | ZAP      | ZANBI    |                    | PO         | BN       | ZAP      | ZANBI    |
| GM1   | TMAX               | 15509.14   | 15477.29 | 17191.5  | 17193.5  | RH                 | 14253.38   | 14249.93 | 15888.05 | 15886.14 |
| GM2   | COM                | 20282.11   | 20274.95 | 23165.59 | 23162.46 | COM                | 17959.85   | 17937.64 | 20330.4  | 20318.21 |
| GM3   | RH                 | 12208.95   | 12209.85 | 13197.53 | 13199.09 | RH                 | 11593.97   | 11594.02 | 12500.05 | 12502.05 |
| GW1   | TMAX               | 3860.145   | 3862.145 | 4201.866 | 4191.8   | COM                | 1322.169   | 7161.356 | 16376.8  | 1256.153 |
| GW2   | RH                 | 19726.18   | 19764.37 | 22387.75 | 22367.18 | COM                | 17293.89   | 17278.02 | 19554.29 | 19551.68 |
| GW3   | RH                 | 11989.46   | 11981.86 | 12986.26 | 12987.24 | RH                 | 9815.229   | 9816.738 | 10443.95 | 10445.95 |

TMAX - Maximum temperature; TMIN - Minimum temperature; RH - Relative humidity; COM - Component; PO - Poisson; BN - Negative binomial; ZAP - Poisson with zero adjustment; ZANBI - Negative binomial with zero adjustment.

**Table S7.** AIC values for selecting variables and models for hospitalizations for mental illnesses and disorders.

| Mental illnesses and disorders |                    |            |          |          |          |  |
|--------------------------------|--------------------|------------|----------|----------|----------|--|
| Bandeirantes                   |                    |            |          |          |          |  |
| Group                          | Selected variables | AIC values |          |          |          |  |
|                                |                    | PO         | BN       | ZAP      | ZANBI    |  |
| GM1                            | TMAX               | 1604.219   | 1022.61  | 1005.392 | 1050.239 |  |
| GM2                            | TMAX               | 198.578    | 141.375  | 171.725  | 224.113  |  |
| GM3                            | -                  | -          | -        | -        | -        |  |
| GW1                            | RH                 | 1174.982   | 769.343  | 1950.79  | 879.369  |  |
| GW2                            | TMIN               | 89.744     | 89.044   | 154.056  | 148.442  |  |
| GW3                            | -                  | -          | -        | -        | -        |  |
| Cascavel                       |                    |            |          |          |          |  |
| Group                          | Selected variables | AIC values |          |          |          |  |
|                                |                    | PO         | BN       | ZAP      | ZANBI    |  |
| GM1                            | TMAX               | 3334.171   | 2743.438 | 2927.319 | 3041.831 |  |
| GM2                            | TMAX               | 846.964    | 701.787  | 808.824  | 816.265  |  |
| GM3                            | TMAX               | 60.674     | 57.377   | 72.096   | 108.10   |  |
| GW1                            | TMAX               | 2358.563   | 1666.335 | 1764.058 | 1824.606 |  |
| GW2                            | TMAX               | 730.755    | 570.263  | 575.1    | 752.0    |  |
| GW3                            | -                  | -          | -        | -        | -        |  |
| Campo Mourão                   |                    |            |          |          |          |  |
| Group                          | Selected variables | AIC values |          |          |          |  |
|                                |                    | PO         | BN       | ZAP      | ZANBI    |  |
| GM1                            | TMAX+TMIN+RH       | 9199.725   | 6591.542 | 6948.226 | 6849.778 |  |
| GM2                            | TMIN               | 2305.304   | 1533.713 | 1553.6   | 1651.116 |  |
| GM3                            | -                  | -          | -        | -        | -        |  |
| GW1                            | TMAX               | 8416.67    | 6389.468 | 6939.831 | 6912.51  |  |
| GW2                            | TMAX               | 2024.902   | 1500.657 | 1576.312 | 1645.789 |  |
| GW3                            | -                  | -          | -        | -        | -        |  |
| Curitiba                       |                    |            |          |          |          |  |
| Group                          | Selected variables | AIC values |          |          |          |  |
|                                |                    | PO         | BN       | ZAP      | ZANBI    |  |
| GM1                            | TMAX+TMIN+RH       | 69162.46   | 27786.78 | 67255.86 | 29951.18 |  |
| GM2                            | TMAX+TMIN+RH       | 21250.99   | 10324.89 | 15333.66 | 10685.88 |  |
| GM3                            | TMIN               | 1441.421   | 926.646  | 941.578  | 967.825  |  |
| GW1                            | TMAX+TMIN+RH       | 41968.19   | 23448.52 | 37728.27 | 25906.1  |  |
| GW2                            | TMAX+TMIN+RH       | 19489.25   | 9474.861 | 13758.18 | 10035.15 |  |
| GW3                            | TMIN               | 970.285    | 778.373  | 1961.78  | 789.731  |  |
| Francisco Beltrão              |                    |            |          |          |          |  |
| Group                          | Selected variables | AIC values |          |          |          |  |
|                                |                    | PO         | BN       | ZAP      | ZANBI    |  |
| GM1                            | TMIN               | 3959.325   | 1955.379 | 2022.444 | 2014.577 |  |
| GM2                            | -                  | -          | -        | -        | -        |  |



| GM3           | -                  | -          | -        | -        | -        |
|---------------|--------------------|------------|----------|----------|----------|
| GW1           | TMIN               | 2256.56    | 1524.98  | 1598.35  | 1635.53  |
| GW2           | -                  | -          | -        | -        | -        |
| GW3           | -                  | -          | -        | -        | -        |
| Foz do Iguaçu |                    |            |          |          |          |
| Group         | Selected variables | AIC values |          |          |          |
|               |                    | PO         | BN       | ZAP      | ZANBI    |
| GM1           | TMAX+TMIN+RH       | 4981.226   | 4934.202 | 5319.098 | 5316.578 |
| GM2           | TMAX               | 1549.396   | 1467.314 | 1791.895 | 1939.559 |
| GM3           | -                  | -          | -        | -        | -        |
| GW1           | TMAX+TMIN+RH       | 2575.849   | 2288.803 | 9831.11  | 2421.641 |
| GW2           | -                  | -          | -        | -        | -        |
| GW3           | -                  | -          | -        | -        | -        |
| Guarapuava    |                    |            |          |          |          |
| Group         | Selected variables | AIC values |          |          |          |
|               |                    | PO         | BN       | ZAP      | ZANBI    |
| GM1           | RH                 | 5920.046   | 5413.724 | 5956.077 | 5882.404 |
| GM2           | RH                 | 1569.527   | 1561.399 | 1696.153 | 1719.295 |
| GM3           | -                  | -          | -        | -        | -        |
| GW1           | RH                 | 5246.02    | 5061.314 | 5537.385 | 5489.685 |
| GW2           | TMAX               | 1987.303   | 1968.874 | 2056.269 | 2720.604 |
| GW3           | -                  | -          | -        | -        | -        |
| Londrina      |                    |            |          |          |          |
| Group         | Selected variables | AIC values |          |          |          |
|               |                    | PO         | BN       | ZAP      | ZANBI    |
| GM1           | TMAX+TMIN+RH       | 4121.629   | 2686.954 | 2836.001 | 2914.929 |
| GM2           | -                  | -          | -        | -        | -        |
| GM3           | -                  | -          | -        | -        | -        |
| GW1           | TMIN               | 3380.232   | 2015.811 | 67887.22 | 2145.195 |
| GW2           | -                  | -          | -        | -        | -        |
| GW3           | -                  | -          | -        | -        | -        |
| Maringá       |                    |            |          |          |          |
| Group         | Selected variables | AIC values |          |          |          |
|               |                    | PO         | BN       | ZAP      | ZANBI    |
| GM1           | TMAX+TMIN+RH       | 5147.468   | 3482.833 | 3488.576 | 10573.49 |
| GM2           | TMIN               | 2109.733   | 1274.976 | 1270.366 | 1340.601 |
| GM3           | -                  | -          | -        | -        | -        |
| GW1           | TMIN               | 4128.362   | 3364.062 | 4142.329 | 3571.359 |
| GW2           | RH                 | 1417.729   | 1109.639 | 1140.43  | 1131.676 |
| GW3           | -                  | -          | -        | -        | -        |
| Paranaguá     |                    |            |          |          |          |
| Group         | Selected variables | AIC values |          |          |          |

|                |                    | PO         | BN       | ZAP      | ZANBI    |
|----------------|--------------------|------------|----------|----------|----------|
| GM1            | TMIN               | 6502.501   | 6498.887 | 6346.979 | 6948.586 |
| GM2            | -                  | -          | -        | -        | -        |
| GM3            | -                  | -          | -        | -        | -        |
| GW1            | TMIN               | 5865.63    | 3702.829 | 3927.659 | 3913.564 |
| GW2            | -                  | -          | -        | -        | -        |
| GW3            | -                  | -          | -        | -        | -        |
| Pato Branco    |                    |            |          |          |          |
| Group          | Selected variables | AIC values |          |          |          |
|                |                    | PO         | BN       | ZAP      | ZANBI    |
| GM1            | TMIN               | 2058.508   | 1456.704 | 1859.954 | 1634.983 |
| GM2            | -                  | -          | -        | -        | -        |
| GM3            | -                  | -          | -        | -        | -        |
| GW1            | RH                 | 1552.081   | 1308.569 | 1689.873 | 1650.682 |
| GW2            | -                  | -          | -        | -        | -        |
| GW3            | -                  | -          | -        | -        | -        |
| Telêmaco Borba |                    |            |          |          |          |
| Group          | Selected variables | AIC Model  |          |          |          |
|                |                    | PO         | BN       | ZAP      | ZANBI    |
| GM1            | RH                 | 6921.54    | 6729.617 | 8707.112 | 6784.491 |
| GM2            | TMAX+TMIN+RH       | 3869.975   | 1781.563 | 1834.96  | 1854.083 |
| GM3            | -                  | -          | -        | -        | -        |
| GW1            | TMIN               | 9441.62    | 5058.284 | 6887.174 | 7411.693 |
| GW2            | TMIN               | 3843.314   | 1350.419 | 2174.048 | 1420.659 |
| GW3            | -                  | -          | -        | -        | -        |

TMAX - Maximum temperature; TMIN - Minimum temperature; RH - Relative humidity. PO - Poisson; BN - Negative binomial; ZAP - Poisson with zero adjustment; ZANBI - Negative binomial with zero adjustment.

**Table S8.** AIC values for selecting variables and models for deaths from cardiovascular and respiratory diseases.

| Cardiovascular diseases |                    |            |          |          |          | Respiratory diseases |            |          |          |          |
|-------------------------|--------------------|------------|----------|----------|----------|----------------------|------------|----------|----------|----------|
| Apucarana               |                    |            |          |          |          |                      |            |          |          |          |
| Group                   | Selected variables | AIC values |          |          |          | Selected variables   | AIC values |          |          |          |
|                         |                    | PO         | BN       | ZAP      | ZANBI    |                      | PO         | BN       | ZAP      | ZANBI    |
| GM1                     | RH                 | 4660.806   | 4661.335 | 4674.76  | 4676.276 | RH                   | 1917.317   | 1919.317 | 2152.094 | 2154.095 |
| GM2                     | TMIN               | 10067.52   | 10069.47 | 10087.64 | 10089.64 | TMIN                 | 5807.861   | 5809.549 | 5811.549 | 6218.307 |
| GM3                     | TMIN               | 10067.52   | 10069.47 | 10087.64 | 10089.64 | TMIN                 | 5809.549   | 5811.549 | 6218.307 | 6220.287 |
| GW1                     | TMIN               | 3602.705   | 3604.583 | 3614.711 | 3616.711 | TMAX                 | 1342.09    | 1344.09  | 1495.012 | 1497.011 |
| GW2                     | TMAX               | 8407.623   | 8409.623 | 8434.824 | 8436.823 | TMAX                 | 4457.072   | 4892.71  | 4893.566 | 5047.243 |
| GW3                     | TMIN               | 7023.385   | 7048.557 | 7050.561 | 7097.706 | TMAX+TMIN+RH         | 4534.99    | 4550.938 | 4972.292 | 4974.292 |
| Bandeirantes            |                    |            |          |          |          |                      |            |          |          |          |
| Group                   | Selected variables | AIC values |          |          |          | Selected variables   | AIC values |          |          |          |
|                         |                    | PO         | BN       | ZAP      | ZANBI    |                      | PO         | BN       | ZAP      | ZANBI    |
| GM1                     | TMIN               | 5924.614   | 5926.614 | 5931.525 | 5933.524 | RH                   | 2231.822   | 2233.822 | 2230.947 | 2243.142 |
| GM2                     | TMIN               | 11781.58   | 11783.27 | 11800.98 | 11794.37 | TMIN                 | 5397.174   | 5399.174 | 5422.751 | 5424.751 |
| GM3                     | TMAX+TMIN+RH       | 7894.774   | 7896.774 | 7923.108 | 7924.472 | TMIN                 | 4614.074   | 4616.074 | 4658.561 | 4643.834 |
| GW1                     | TMAX               | 4335.421   | 4337.419 | 4340.522 | 4342.52  | RH                   | 1657.176   | 1659.176 | 2401.447 | 2046.941 |
| GW2                     | TMIN               | 10213.38   | 10204.56 | 10219.73 | 10220.96 | TMIN                 | 4465.774   | 4467.774 | 4502.235 | 4504.373 |
| GW3                     | TMIN               | 9417.034   | 9418.991 | 9449.071 | 9444.558 | TMIN                 | 4626.641   | 4625.001 | 4682.726 | 4684.766 |
| Cascavel                |                    |            |          |          |          |                      |            |          |          |          |
| Group                   | Selected variables | AIC values |          |          |          | Selected variables   | AIC values |          |          |          |
|                         |                    | PO         | BN       | ZAP      | ZANBI    |                      | PO         | BN       | ZAP      | ZANBI    |
| GM1                     | TMIN               | 6085.815   | 6087.815 | 6092.279 | 6094.279 | TMIN                 | 2706.499   | 2708.499 | 2729.509 | 3220.056 |
| GM2                     | TMIN               | 12321.41   | 12323.17 | 12363.1  | 12364.88 | TMIN                 | 7588.588   | 7590.223 | 7683.252 | 7677.092 |
| GM3                     | TMAX               | 7782.719   | 7784.503 | 7872.875 | 7956.032 | TMIN                 | 5498.587   | 5500.571 | 5637.643 | 5639.118 |
| GW1                     | TMAX               | 5254.076   | 5254.293 | 5256.293 | 5272.647 | TMAX                 | 2173.225   | 2175.225 | 2199.109 | 2201.109 |
| GW2                     | TMAX               | 10762.15   | 10762.07 | 10789.94 | 10791.72 | COM                  | 5984.094   | 5886.094 | 6056.579 | 6055.265 |

| GW3               | TMIN               | 8884.257   | 8885.146 | 9039.597 | 9031.193 | TMIN               | 5246.446   | 5246.369 | 5418.149 | 5420.485 |
|-------------------|--------------------|------------|----------|----------|----------|--------------------|------------|----------|----------|----------|
| Campo Mourão      |                    |            |          |          |          |                    |            |          |          |          |
| Group             | Selected variables | AIC values |          |          |          | Selected variables | AIC values |          |          |          |
|                   |                    | PO         | BN       | ZAP      | ZANBI    |                    | PO         | BN       | ZAP      | ZANBI    |
| GM1               | TMIN               | 8328.328   | 8330.328 | 8435.828 | 8437.616 | TMIN               | 3932.077   | 3934.077 | 4020.51  | 4023.557 |
| GM2               | TMIN               | 15302.16   | 15304.16 | 15417.8  | 15419.8  | TMIN               | 9215.204   | 9217.204 | 9354.872 | 9354.926 |
| GM3               | TMIN               | 10605.09   | 10607.09 | 10763.31 | 10762.45 | TMIN               | 7188.451   | 7189.387 | 7314.674 | 7316.024 |
| GW1               | TMIN               | 6749.137   | 6751.137 | 6864.482 | 6866.389 | TMIN               | 3174.693   | 3176.693 | 3239.135 | 3238.169 |
| GW2               | TMIN               | 13692.21   | 13694.21 | 13767.63 | 13769.41 | TMIN               | 7947.196   | 7949.196 | 8091.129 | 8082.265 |
| GW3               | TMIN               | 11238.43   | 11240.1  | 11354.61 | 11353.65 | TMAX/TMIN/RH       | 6562.972   | 6564.968 | 6757.052 | 6759.095 |
| Curitiba          |                    |            |          |          |          |                    |            |          |          |          |
| Group             | Selected variables | AIC values |          |          |          | Selected variables | AIC values |          |          |          |
|                   |                    | PO         | BN       | ZAP      | ZANBI    |                    | PO         | BN       | ZAP      | ZANBI    |
| GM1               | TMIN               | 20001.82   | 19994.07 | 20006.38 | 20008.39 | TMIN               | 11602.12   | 11588.22 | 11667.79 | 11669    |
| GM2               | TMIN               | 27371.8    | 27370.26 | 27406.98 | 27404.45 | TMIN               | 20055.44   | 20051.14 | 20133.68 | 20132.48 |
| GM3               | TMIN               | 20203.97   | 20205.03 | 20391.82 | 20393.77 | TMIN               | 16093.62   | 16095.54 | 16302.35 | 16300.7  |
| GW1               | TMIN               | 17479.18   | 17480.64 | 17511.66 | 17513.67 | TMIN               | 9590.31    | 9590.505 | 9669.988 | 9662.773 |
| GW2               | TMIN               | 26380.45   | 26366.94 | 26413.9  | 26409    | TMIN               | 19496.8    | 19491.65 | 19655.98 | 19656.65 |
| GW3               | TMIN               | 24468.7    | 24464.98 | 24651.26 | 24651.37 | TMAX+TMIN+RH       | 18284.44   | 18267.8  | 18545.56 | 18544.68 |
| Francisco Beltrão |                    |            |          |          |          |                    |            |          |          |          |
| Group             | Selected variables | AIC values |          |          |          | Selected variables | AIC values |          |          |          |
|                   |                    | PO         | BN       | ZAP      | ZANBI    |                    | PO         | BN       | ZAP      | ZANBI    |
| GM1               | TMIN               | 3942.658   | 3944.658 | 3950.224 | 3953.039 | TMIN               | 16542.85   | 16528.96 | 18718.07 | 18719.34 |
| GM2               | TMIN               | 9193.581   | 9193.066 | 9209.858 | 9211.858 | TMAX+TMIN+RH       | 6683.675   | 6685.412 | 6723.424 | 6724.405 |
| GM3               | TMIN               | 5902.195   | 5903.826 | 5974.851 | 5976.927 | TMIN               | 4665.291   | 72834.98 | 4721.916 | 4723.916 |
| GW1               | TMIN               | 3391.608   | 3393.155 | 3395.56  | 11530    | TMIN               | 1620.226   | 1622.226 | 1632.274 | 1660.574 |
| GW2               | TMIN               | 8299.382   | 8301.382 | 8325.591 | 8327.567 | TMIN               | 4658.975   | 4660.975 | 4704.599 | 4707.037 |

| GW3           | TMAX+TMIN+RH       | 7566.715   | 7568.715 | 7696.757 | 7698.799 | TMAX+TMIN+RH       | 4315.681   | 4317.681 | 4419.76  | 4421.76  |
|---------------|--------------------|------------|----------|----------|----------|--------------------|------------|----------|----------|----------|
| Foz do Iguaçu |                    |            |          |          |          |                    |            |          |          |          |
| Group         | Selected variables | AIC values |          |          |          | Selected variables | AIC values |          |          |          |
|               |                    | PO         | BN       | ZAP      | ZANBI    |                    | PO         | BN       | ZAP      | ZANBI    |
| GM1           | RH                 | 4446.538   | 4448.538 | 4803.846 | 4802.544 | TMAX+TMIN+RH       | 2555.209   | 2557.209 | 2778.613 | 2780.476 |
| GM2           | TMAX               | 8903.794   | 8905.794 | 9222.661 | 9224.66  | TMIN               | 5951.737   | 5953.737 | 6277.278 | 6279.26  |
| GM3           | TMIN               | 4901.198   | 4903.198 | 5239.682 | 5241.682 | TMIN               | 3818.63    | 3820.63  | 4042.614 | 4034.759 |
| GW1           | TMAX               | 3694.776   | 3696.776 | 4028.796 | 4026.361 | RH                 | 1725.408   | 1727.408 | 1907.904 | 1909.895 |
| GW2           | TMIN               | 7205.143   | 7563.745 | 7565.745 | 7568.246 | TMIN               | 4188.318   | 4190.318 | 4432.676 | 4434.676 |
| GW3           | RH                 | 5815.521   | 5817.521 | 6098     | 6095.868 | TMIN               | 3530.57    | 3532.57  | 3770.87  | 5403.574 |
| Guarapuava    |                    |            |          |          |          |                    |            |          |          |          |
| Group         | Selected variables | AIC values |          |          |          | Selected variables | AIC values |          |          |          |
|               |                    | PO         | BN       | ZAP      | ZANBI    |                    | PO         | BN       | ZAP      | ZANBI    |
| GM1           | TMIN               | 7021.824   | 7023.824 | 7034.422 | 7036.422 | TMIN               | 3611.72    | 3609.853 | 3616.006 | 3612.709 |
| GM2           | COM                | 13275.52   | 13177.52 | 13322.19 | 13324.16 | COM                | 8732.9     | 8727.216 | 8777.847 | 8770.366 |
| GM3           | COM                | 8349.84    | 8341.105 | 8412.801 | 8413.746 | TMIN               | 5323.096   | 5323.945 | 5406.724 | 5406.724 |
| GW1           | COM                | 6278.958   | 6278.726 | 6204.982 | 6306.959 | COM                | 3244.776   | 3344.644 | 3356.784 | 3257.904 |
| GW2           | COM                | 12766.83   | 12668.1  | 12825.21 | 12827    | COM                | 8394.117   | 8392.21  | 8462.887 | 8464.108 |
| GW3           | COM                | 10344.77   | 10346.77 | 10442.58 | 10444.58 | COM                | 5781.017   | 5783.017 | 5900.087 | 5902.09  |
| Londrina      |                    |            |          |          |          |                    |            |          |          |          |
| Group         | Selected variables | AIC values |          |          |          | Selected variables | AIC values |          |          |          |
|               |                    | PO         | BN       | ZAP      | ZANBI    |                    | PO         | BN       | ZAP      | ZANBI    |
| GM1           | TMIN               | 11722.49   | 11729.74 | 11725.28 | 11724.88 | TMAX+TMIN+RH       | 20286.33   | 20295.59 | 20315.34 | 20317.34 |
| GM2           | TMAX+TMIN+RH       | 13148.28   | 13155.16 | 13207.48 | 13201.18 | TMIN               | 20293.96   | 20195.59 | 20315.34 | 20317.34 |
| GM3           | TMAX+TMIN+RH       | 11527.08   | 11532.33 | 11717.94 | 11719.9  | TMIN               | 9087.174   | 9084.537 | 9090.505 | 9092.44  |
| GW1           | RH                 | 3672.607   | 3664.607 | 3676.521 | 3678.52  | RH                 | 17851.27   | 17852.88 | 17884.04 | 17886.01 |
| GW2           | TMIN               | 10842.04   | 10849.94 | 10938.08 | 10940.03 | TMIN               | 17226.88   | 17136.36 | 17329.25 | 17331.25 |

| GW3       | TMAX+TMIN+RH       | 11811.35   | 11871.16 | 12106.35 | 12103.81 | TMAX+TMIN+RH       | 17226.88   | 17236.36 | 17329.25 | 17331.25 |
|-----------|--------------------|------------|----------|----------|----------|--------------------|------------|----------|----------|----------|
| Maringá   |                    |            |          |          |          |                    |            |          |          |          |
| Group     | Selected variables | AIC values |          |          |          | Selected variables | AIC values |          |          |          |
|           |                    | PO         | BN       | ZAP      | ZANBI    |                    | PO         | BN       | ZAP      | ZANBI    |
| GM1       | TMIN               | 8924.535   | 8926.535 | 8941.405 | 8943.407 | TMIN               | 4166.878   | 4168.878 | 4183.914 | 4183.87  |
| GM2       | TMAX+TMIN+RH       | 16709.28   | 16711.28 | 16727.93 | 16729.74 | TMIN               | 10180.35   | 10182.34 | 10214.67 | 10216.63 |
| GM3       | TMAX+TMIN+RH       | 12075.52   | 12077.46 | 12148.44 | 12150.44 | TMIN               | 8580.721   | 8582.72  | 8714.582 | 8716.585 |
| GW1       | TMIN               | 6966.158   | 6968.143 | 6985.215 | 6986.307 | TMAX+TMIN+RH       | 2683.547   | 2685.416 | 2707.256 | 2707.547 |
| GW2       | TMAX+TMIN+RH       | 14499.29   | 14496.97 | 14507.86 | 14508.65 | TMIN               | 7822.948   | 7824.877 | 7872.441 | 7874.338 |
| GW3       | TMAX+TMIN+RH       | 13880.93   | 13882.93 | 13999.43 | 14001.43 | RH                 | 8613.995   | 8615.97  | 8783.031 | 8784.331 |
| Palmas    |                    |            |          |          |          |                    |            |          |          |          |
| Group     | Selected variables | AIC values |          |          |          | Selected variables | AIC values |          |          |          |
|           |                    | PO         | BN       | ZAP      | ZANBI    |                    | PO         | BN       | ZAP      | ZANBI    |
| GM1       | TMAX               | 1862.199   | 1854.521 | 1859.678 | 2039.028 | TMAX               | 887.8376   | 889.8376 | 891.4067 | 893.4067 |
| GM2       | RH                 | 3812.296   | 3813.709 | 3809.234 | 3879.451 | TMIN               | 2324.375   | 2324.942 | 2329.018 | 2331.018 |
| GM3       | TMIN               | 1718.278   | 1723.864 | 1729.825 | 1731.825 | TMIN               | 1414.297   | 1416.297 | 1425.975 | 1427.975 |
| GW1       | RH                 | 1957.346   | 1959.346 | 1954.501 | 1956.501 | -                  | -          | -        | -        | -        |
| GW2       | TMIN               | 3063.069   | 3063.586 | 3074.187 | 3075.165 | TMIN               | 2031.401   | 2032.392 | 2051.575 | 2053.664 |
| GW3       | TMIN               | 2164.579   | 2166.579 | 2185.032 | 2187.038 | TMIN               | 1381.73    | 1380.57  | 1382.019 | 1384.019 |
| Paranaguá |                    |            |          |          |          |                    |            |          |          |          |
| Group     | Selected variables | AIC values |          |          |          | Selected variables | AIC values |          |          |          |
|           |                    | PO         | BN       | ZAP      | ZANBI    |                    | PO         | BN       | ZAP      | ZANBI    |
| GM1       | TMIN               | 5096.088   | 5098.07  | 5118.437 | 5120.429 | RH                 | 2276.489   | 2278.489 | 2291.766 | 2293.765 |
| GM2       | TMIN               | 10300.97   | 10302.9  | 10306.24 | 10308.24 | TMIN               | 4842.202   | 4842.052 | 4871.396 | 4873.075 |
| GM3       | TMIN               | 5555.016   | 5557.016 | 5578.785 | 5580.788 | TMAX               | 2946.756   | 2945.438 | 3124.197 | 2991.12  |
| GW1       | TMIN               | 4055.306   | 4055.846 | 4066.831 | 4063.102 | TMIN               | 1877.738   | 1878.526 | 1886.864 | 2442.572 |
| GW2       | TMIN               | 8390.454   | 8392.454 | 8408.934 | 8403.46  | TMIN               | 4181.961   | 4183.942 | 4257.294 | 4183.565 |



| GW3            | RH                 | 6616.023   | 6618.023 | 6633.849 | 6624.457 | TMIN               | 3688.145   | 3689.93  | 3771.584 | 3771.679 |
|----------------|--------------------|------------|----------|----------|----------|--------------------|------------|----------|----------|----------|
| Pato Branco    |                    |            |          |          |          |                    |            |          |          |          |
| Group          | Selected variables | AIC values |          |          |          | Selected variables | AIC values |          |          |          |
|                |                    | PO         | BN       | ZAP      | ZANBI    |                    | PO         | BN       | ZAP      | ZANBI    |
| GM1            | TMAX               | 2896.224   | 2879.406 | 2884.928 | 2895.647 | TMIN               | 1128.621   | 1118.037 | 1131.132 | 1184.798 |
| GM2            | TMIN               | 6959.355   | 6912.581 | 6929.669 | 6922.153 | TMIN               | 5021.661   | 5003.748 | 5033.572 | 5017.031 |
| GM3            | TMIN               | 4269.914   | 4246.57  | 4271.442 | 4276.08  | TMAX               | 3558.26    | 3521.119 | 3576.538 | 3575.956 |
| GW1            | RH                 | 3258.204   | 3224.791 | 3221.647 | 3224.23  | TMIN               | 1579.552   | 1567.847 | 1569.561 | 1625.196 |
| GW2            | TMIN               | 6233.359   | 6190.531 | 6214.719 | 6203.415 | TMIN               | 3914.683   | 3901.912 | 3936.883 | 3938.514 |
| GW3            | TMIN               | 5438.014   | 5408.034 | 5479.768 | 5481.769 | RH                 | 3249.882   | 3240.857 | 3269.485 | 3616.69  |
| Telêmaco Borba |                    |            |          |          |          |                    |            |          |          |          |
| Group          | Selected variables | AIC values |          |          |          | Selected variables | AIC values |          |          |          |
|                |                    | PO         | BN       | ZAP      | ZANBI    |                    | PO         | BN       | ZAP      | ZANBI    |
| GM1            | TMAX+TMIN+RH       | 8109.733   | 8111.733 | 8129.612 | 8131.61  | TMAX+TMIN+RH       | 3800.087   | 3801.278 | 3828.216 | 3817.343 |
| GM2            | TMAX+TMIN+RH       | 14828.18   | 14829.71 | 14848.83 | 14850.77 | TMIN               | 8676.779   | 8676.026 | 8778.967 | 8777.629 |
| GM3            | TMIN               | 9670.669   | 9711.117 | 9718.314 | 9719.848 | TMAX+TMIN+RH       | 6239.881   | 6240.518 | 6334.03  | 6335.989 |
| GW1            | TMIN               | 6868.36    | 6880.114 | 6893.471 | 6882.112 | TMAX+TMIN+RH       | 3317.963   | 3319.963 | 3342.402 | 3345.671 |
| GW2            | TMIN               | 13359.06   | 13358.62 | 13387.72 | 13389.72 | TMAX+TMIN+RH       | 8321.228   | 8322.517 | 8432.705 | 8434.702 |
| GW3            | TMIN               | 10554.31   | 10556.13 | 10640.14 | 10638.01 | TMIN               | 6340.659   | 6336.69  | 6482.271 | 6484.271 |
| Toledo         |                    |            |          |          |          |                    |            |          |          |          |
| Group          | Selected variables | AIC values |          |          |          | Selected variables | AIC values |          |          |          |
|                |                    | PO         | BN       | ZAP      | ZANBI    |                    | PO         | BN       | ZAP      | ZANBI    |
| GM1            | TMIN               | 8111.696   | 8113.696 | 8128.777 | 8130.774 | TMAX               | 3798.656   | 3799.792 | 3828.469 | 3804.182 |
| GM2            | TMIN               | 10780.25   | 10782.25 | 11170.3  | 11172.3  | TMIN               | 6435.977   | 6437.977 | 6866.979 | 6868.957 |
| GM3            | TMAX+TMIN+RH       | 7070.929   | 7072.929 | 7560.641 | 7562.641 | TMAX               | 4577.988   | 4579.988 | 5102.625 | 5098.737 |
| GW1            | TMIN               | 3649.877   | 3651.877 | 3957.071 | 3959.024 | TMAX               | 1288.814   | 1290.814 | 1291.331 | 1488.452 |
| GW2            | TMAX+TMIN+RH       | 9041.821   | 9043.821 | 9427.759 | 9427.735 | TMAX               | 3853.514   | 3855.514 | 4319.456 | 4321.438 |

| GW3      | TMIN               | 8483.956   | 8485.956 | 9035.042 | 9036.662 | TMIN               | 3899.002   | 3901.002 | 4467.102 | 4469.102 |
|----------|--------------------|------------|----------|----------|----------|--------------------|------------|----------|----------|----------|
| Umuarama |                    |            |          |          |          |                    |            |          |          |          |
| Group    | Selected variables | AIC values |          |          |          | Selected variables | AIC values |          |          |          |
|          |                    | PO         | BN       | ZAP      | ZANBI    |                    | PO         | BN       | ZAP      | ZANBI    |
| GM1      | TMIN               | 5409.849   | 5411.849 | 5675.926 | 5678.026 | TMAX               | 2110.205   | 2112.937 | 2361.577 | 2363.791 |
| GM2      | COM                | 11204.34   | 11206.34 | 11515.87 | 11517.87 | COM                | 6056.649   | 6058.649 | 6467.934 | 6466.405 |
| GM3      | TMIN               | 8068.677   | 8070.677 | 8514.971 | 8516.976 | TMIN               | 4752.264   | 4754.264 | 5283.823 | 5285.663 |
| GW1      | TMAX               | 3860.145   | 3862.145 | 4189.644 | 4191.211 | COM                | 1320.804   | 1323.732 | 1320.253 | 16376.8  |
| GW2      | RH                 | 8927.688   | 8929.688 | 9300.364 | 9302.177 | TMIN               | 3955.238   | 3952.315 | 4352.054 | 4353.829 |
| GW3      | TMIN               | 7918.749   | 7920.749 | 8394.036 | 8396.026 | RH                 | 3838.168   | 3840.168 | 4460.765 | 4462.788 |

TMAX - Maximum temperature; TMIN - Minimum temperature; RH - Relative humidity; COM - Component; PO - Poisson; BN - Negative binomial; ZAP - Poisson with zero adjustment; ZANBI - Negative binomial with zero adjustment.
